# Supplementary material for: A four-component domino reaction for the synthesis of novel bridgehead nitrogen-containing pyrido[1,2-d][1,4]diazepines
Source: Royal Society of Chemistry journal article supplement (doi:10.1039/d1nj04233e), 2021-11-26
Supplement: d1nj04233e1.pdf [file d1nj04233e1.pdf]

## Supporting Information

### **A four-component domino reaction for the synthesis of novel bridgehead nitrogen-containing pyrido[1,2-*d*][1,4]diazepines**

Rui Wang<sup>#</sup>, Wei Zhang<sup>#</sup>, Ying Tang, Ze-Hui Qi, Yuan-Hui Yu, and Hong-Bo Tan\*,  
Dian-Yong Tang, Zhi-Gang Xu, Zhong-Zhu Chen\*

National & Local Joint Engineering Research Center of Targeted and Innovative Therapeutics,  
Chongqing Engineering Laboratory of Targeted and Innovative Therapeutics, Chongqing Key  
Laboratory of Kinase Modulators as Innovative Medicine, Chongqing Collaborative Innovation  
Center of Targeted and Innovative Therapeutics, College of Pharmacy & IATTI, Chongqing  
University of Arts and Sciences, Chongqing 402160, China.

<sup>#</sup>These authors contributed equally to this work.

\*Corresponding author: 13167859296@163.com (Hong-Bo Tan); 18883138277@163.com  
(Zhong-Zhu Chen)

| <u>Content</u>                                                                | <u>Page #</u> |
|-------------------------------------------------------------------------------|---------------|
| <sup>1</sup> H NMR and <sup>13</sup> C NMR spectrum of compound <b>4a-u</b> . | 1             |
| <sup>1</sup> H NMR and <sup>13</sup> C NMR spectrum of compound <b>6a</b> .   | 18            |
| <sup>1</sup> H NMR and <sup>13</sup> C NMR spectrum of compound <b>8a</b> .   | 19            |
| ORTEP diagram of crystal structures of <b>4b</b> .                            | 20            |
| ORTEP diagram of crystal structures of <b>4h</b> .                            | 21            |
| ORTEP diagram of crystal structures of <b>4i</b> .                            | 22            |
| HPLC chromatogram of compounds <b>4i-u</b> .                                  | 23            |

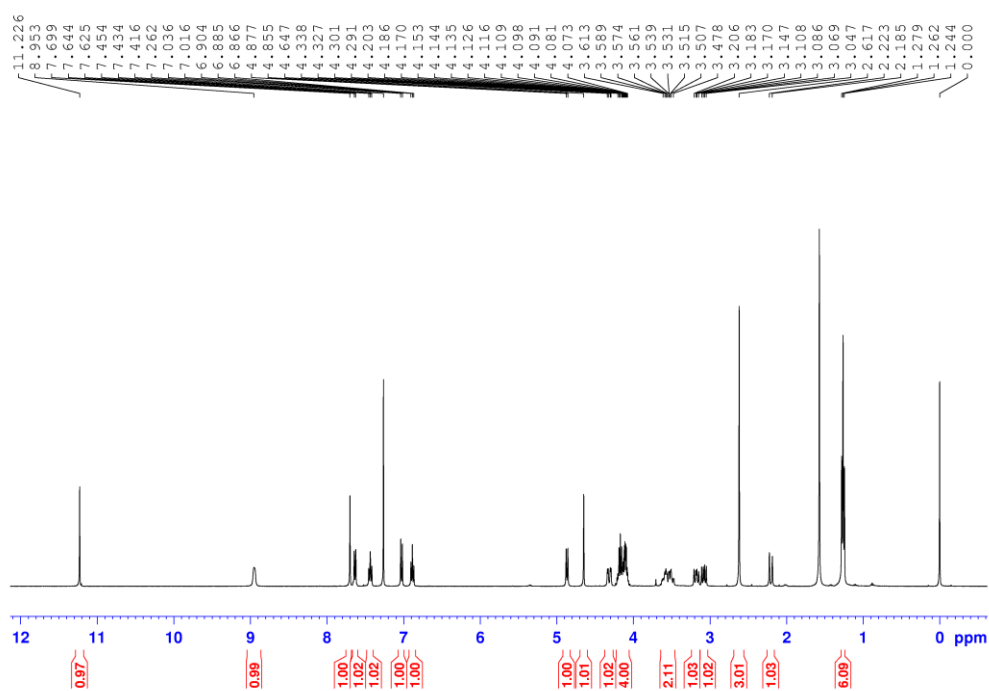SI-Fig. 1. <sup>1</sup>H NMR spectrum of compound 4a.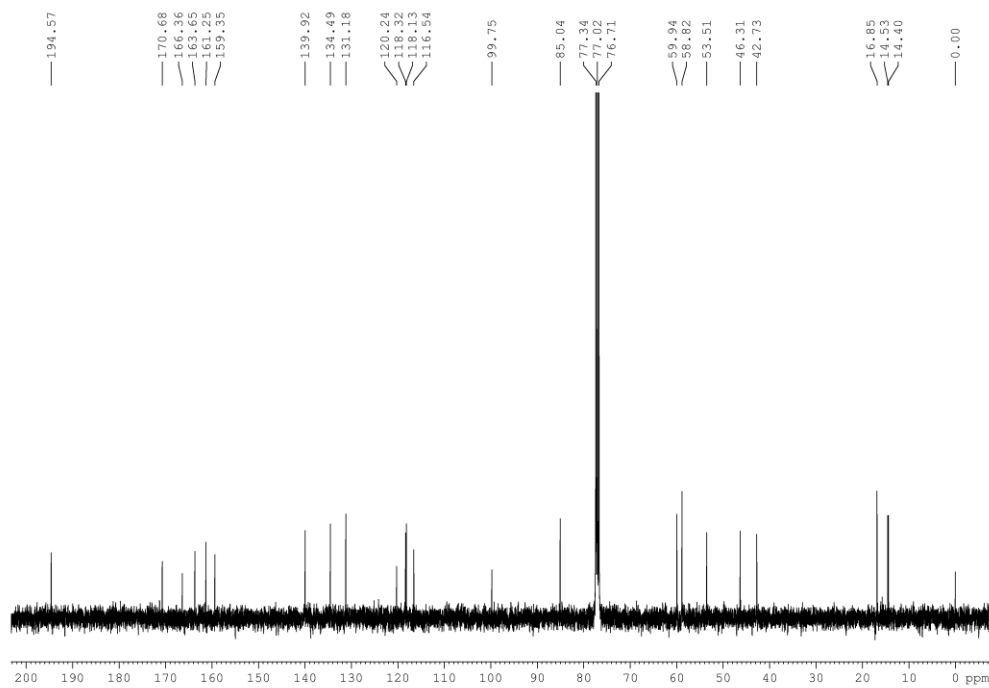SI-Fig. 2. <sup>13</sup>C NMR spectrum of compound 4a.

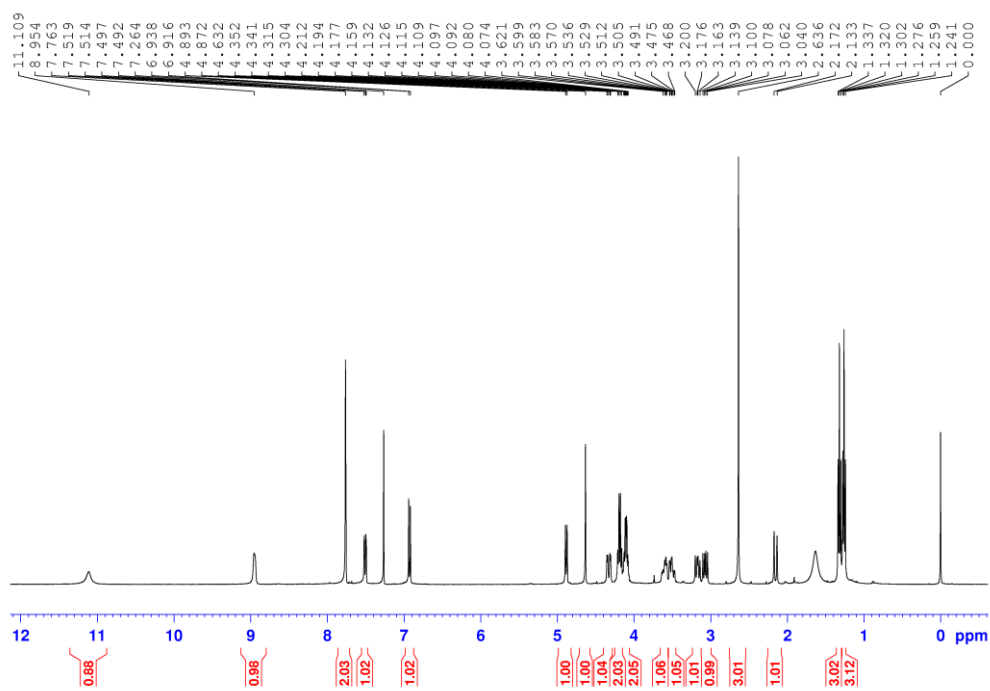SI-Fig. 3. <sup>1</sup>H NMR spectrum of compound 4b.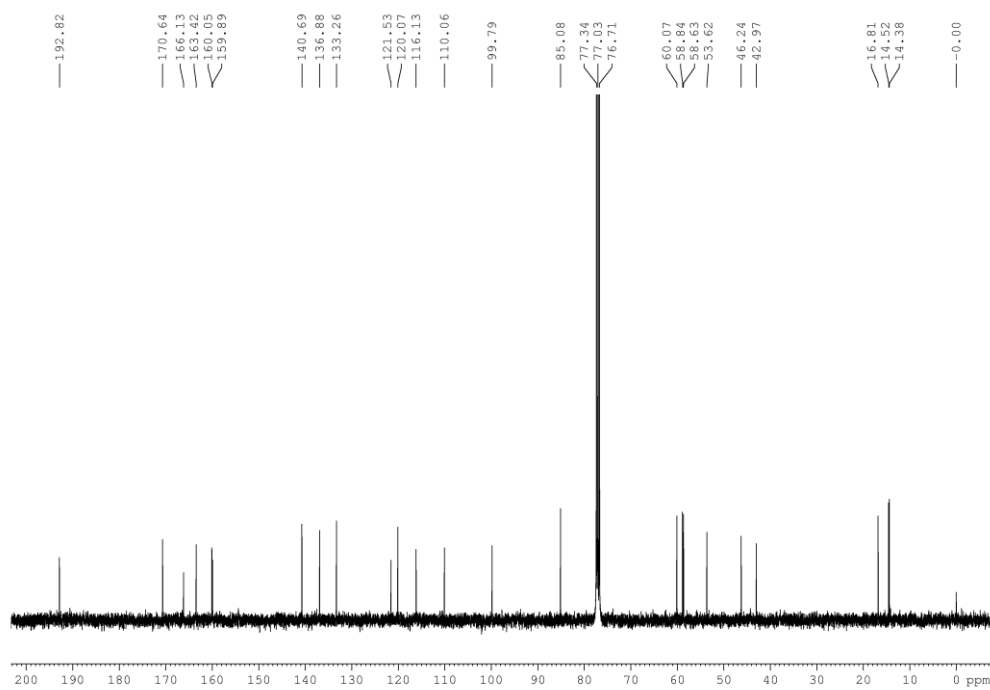SI-Fig. 4. <sup>13</sup>C NMR spectrum of compound 4b.

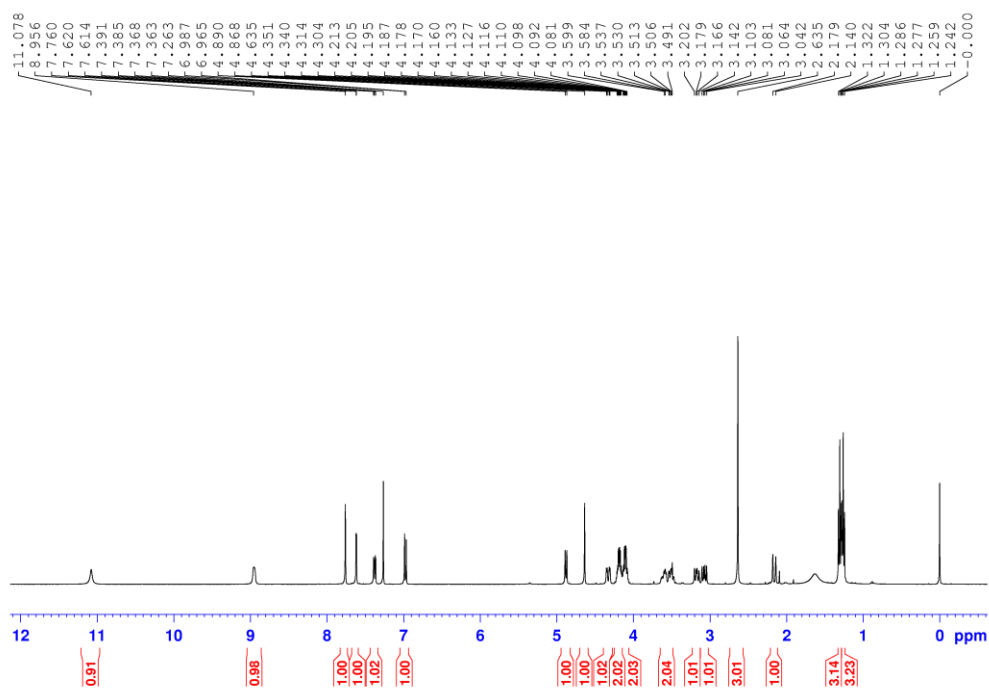SI-Fig. 5.  $^1\text{H}$  NMR spectrum of compound **4c**.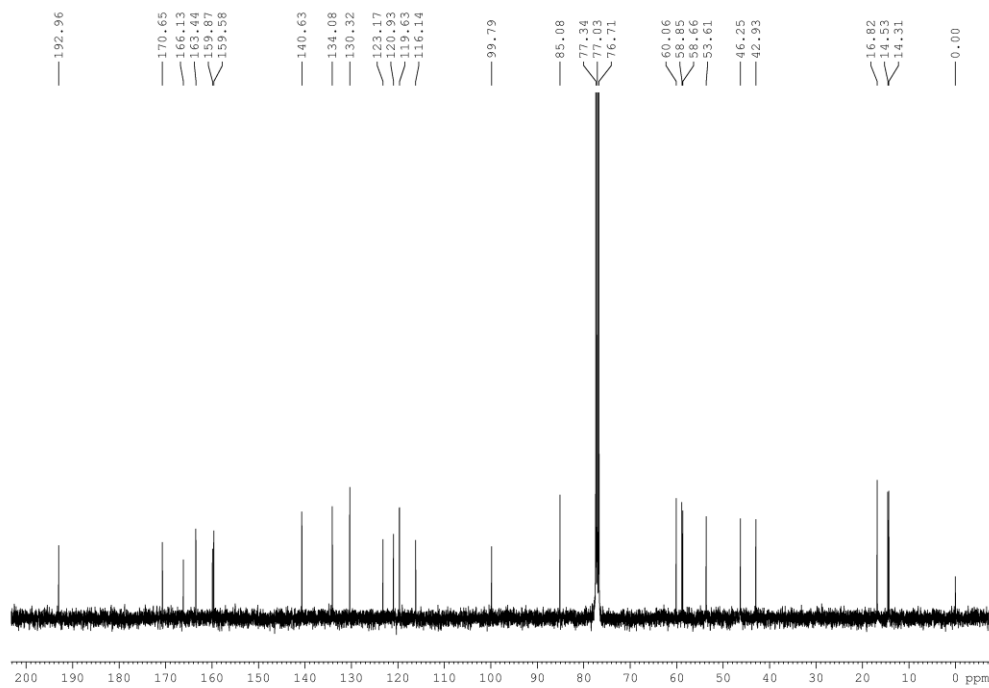SI-Fig. 6.  $^{13}\text{C}$  NMR spectrum of compound **4c**.

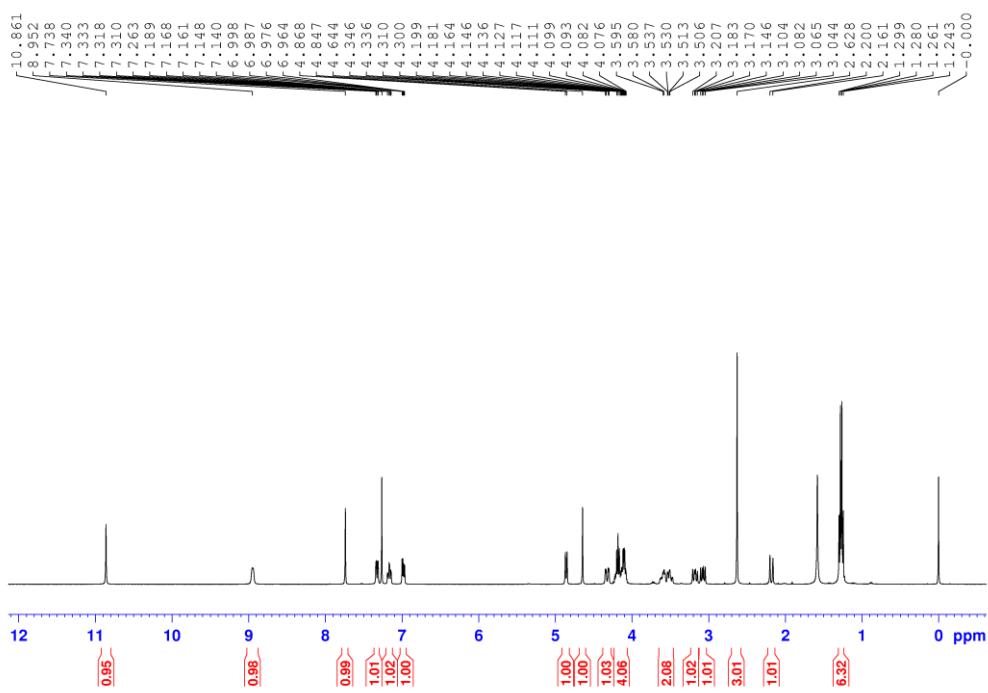SI-Fig. 7. <sup>1</sup>H NMR spectrum of compound **4d**.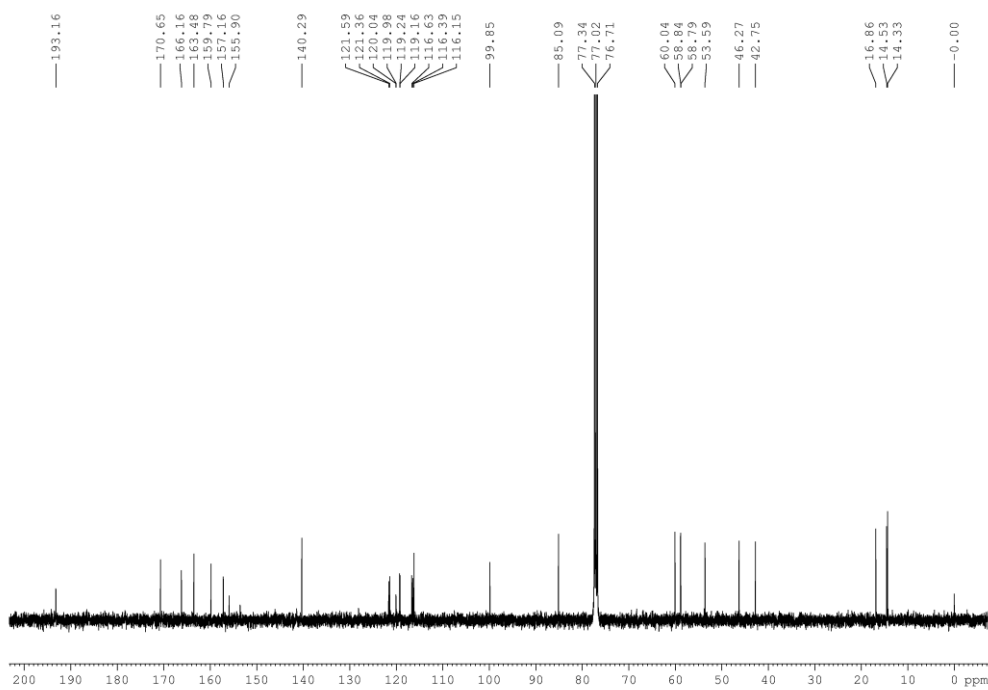SI-Fig. 8. <sup>13</sup>C NMR spectrum of compound **4d**.

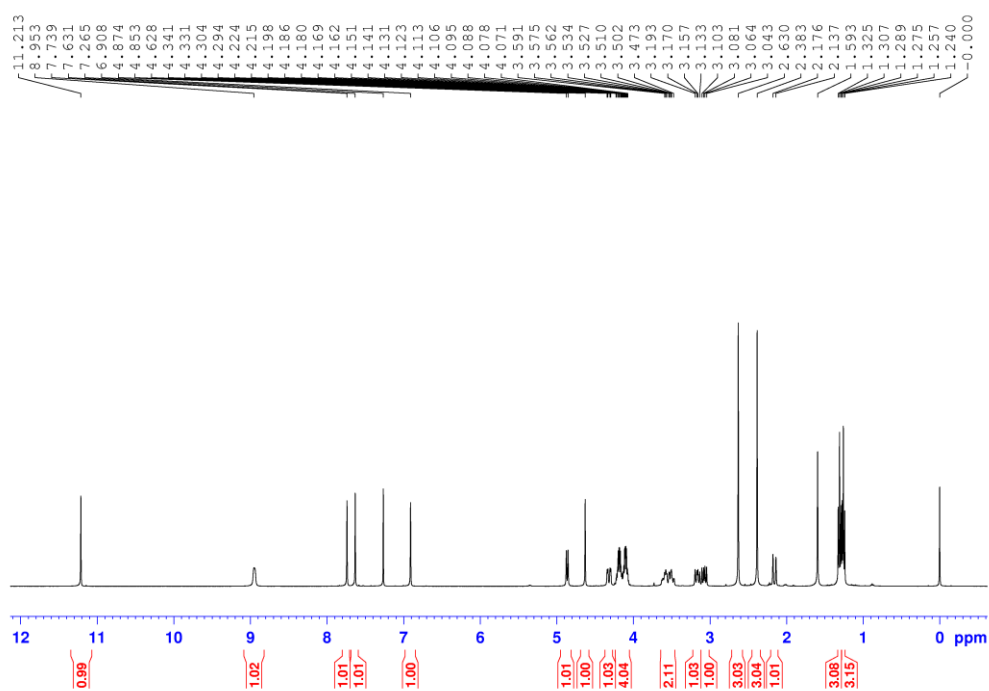SI-Fig. 9. <sup>1</sup>H NMR spectrum of compound 4e.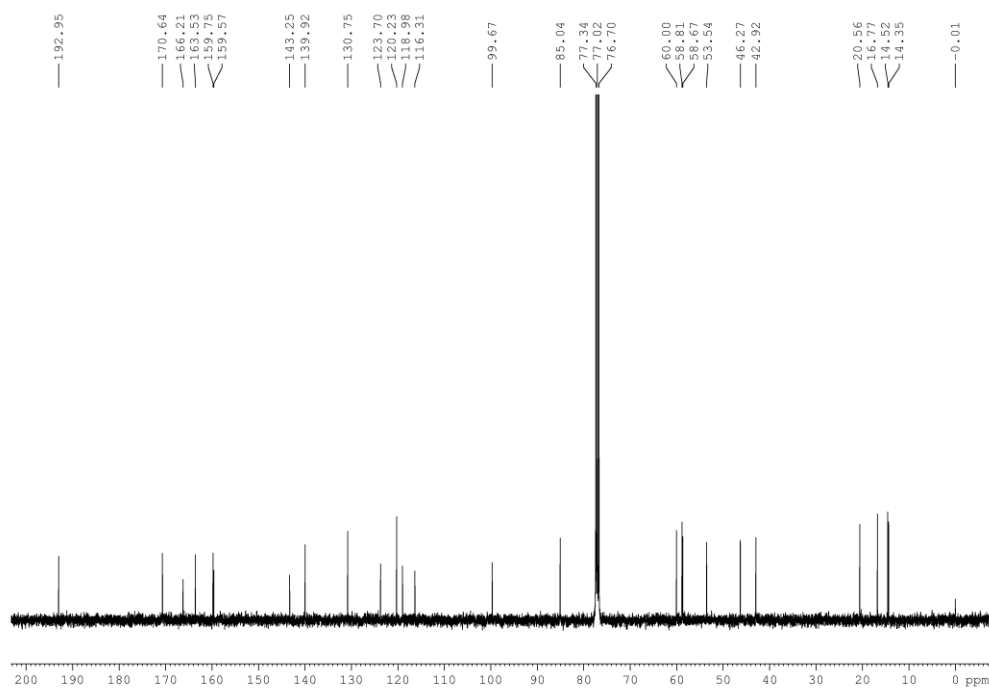SI-Fig. 10. <sup>13</sup>C NMR spectrum of compound 4e.

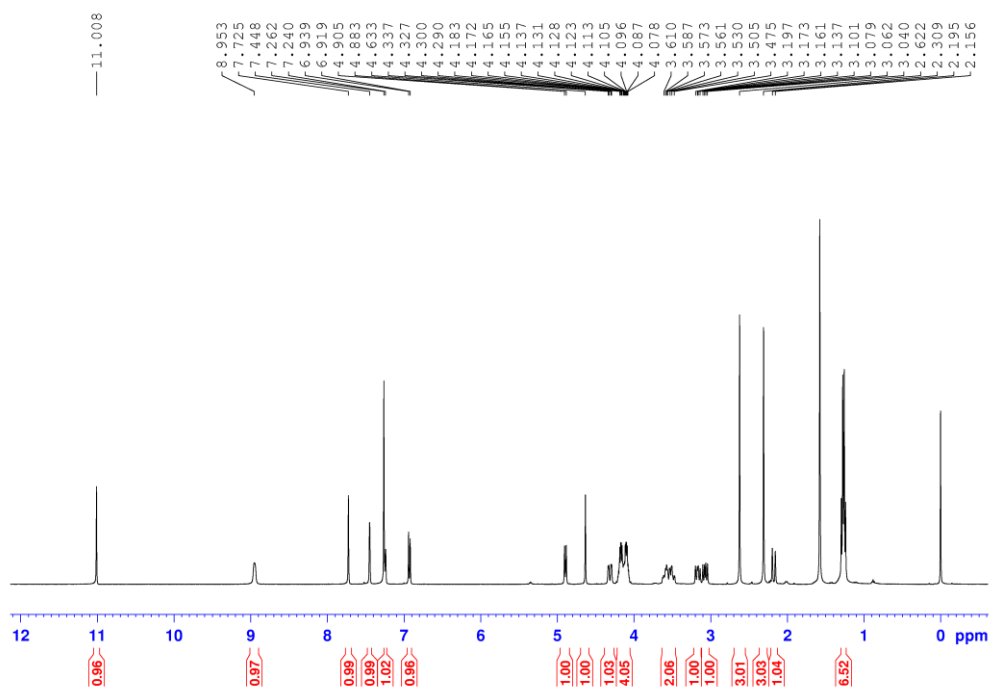SI-Fig. 11.  $^1\text{H}$  NMR spectrum of compound **4f**.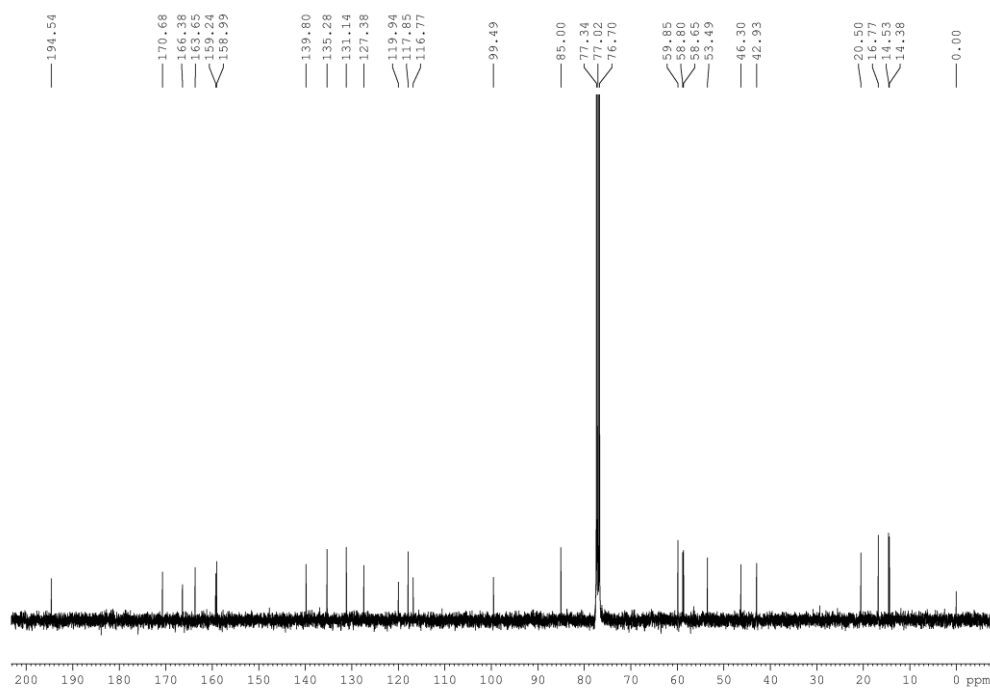SI-Fig. 12.  $^{13}\text{C}$  NMR spectrum of compound **4f**.

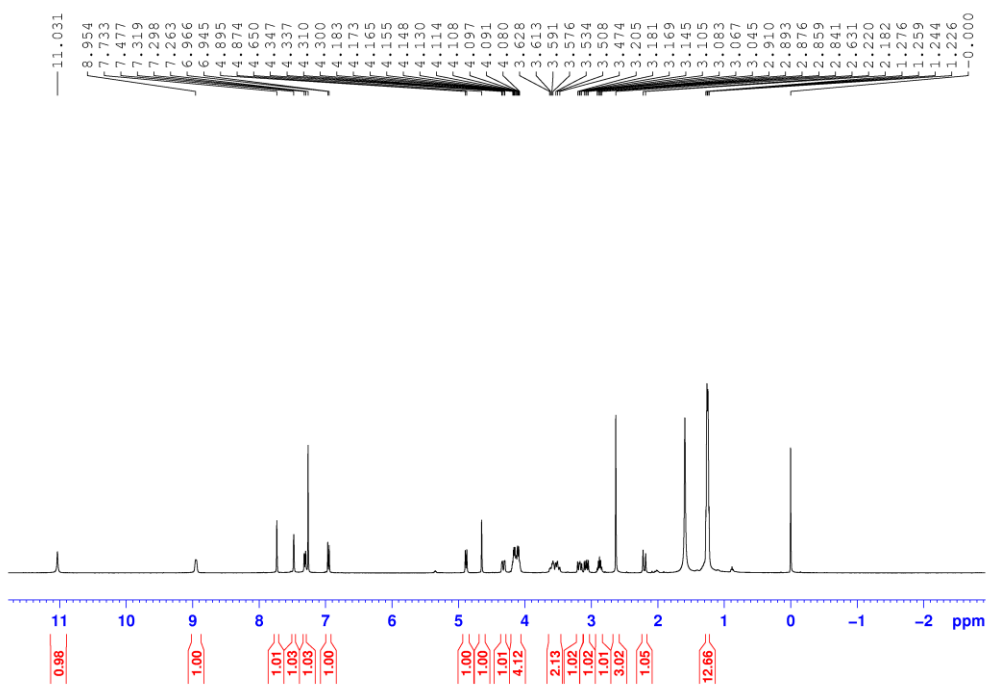SI-Fig. 13. <sup>1</sup>H NMR spectrum of compound **4g**.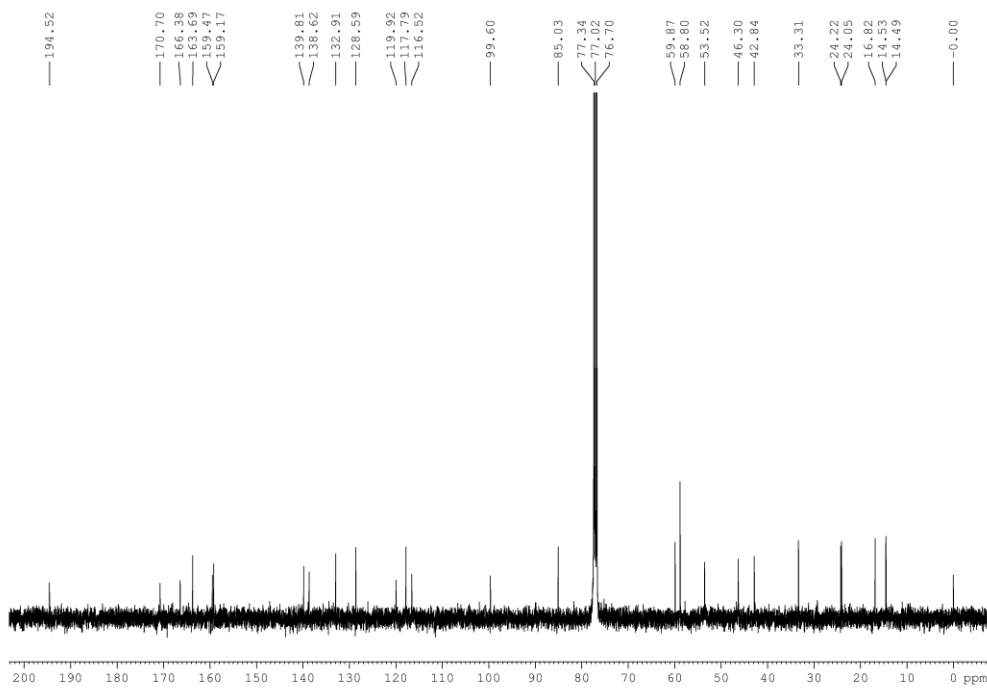SI-Fig. 14. <sup>13</sup>C NMR spectrum of compound **4g**.



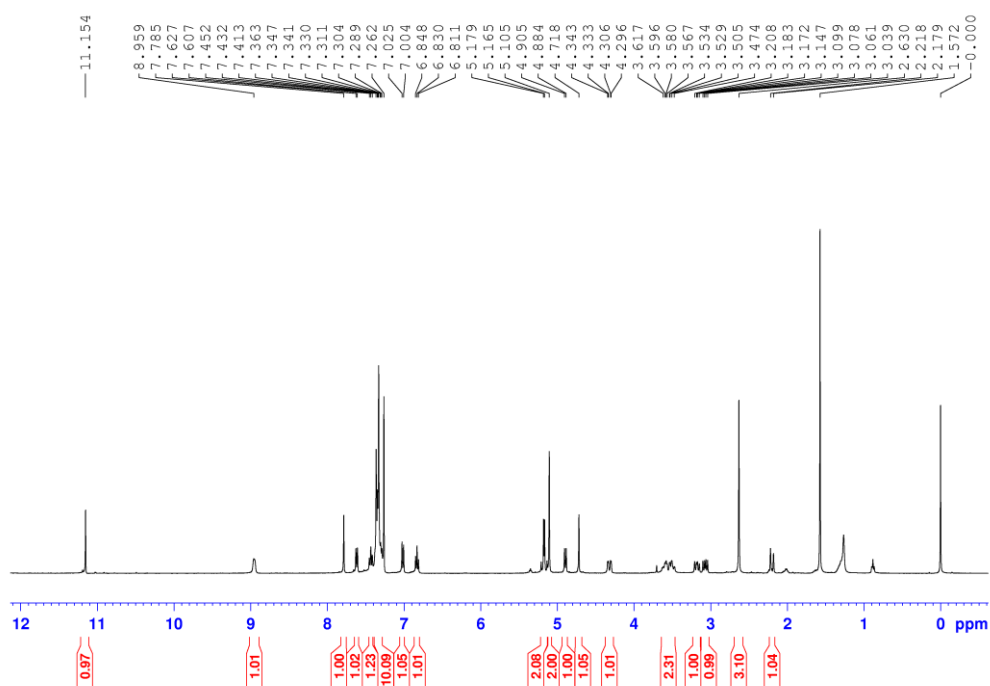SI-Fig. 15. <sup>1</sup>H NMR spectrum of compound **4h**.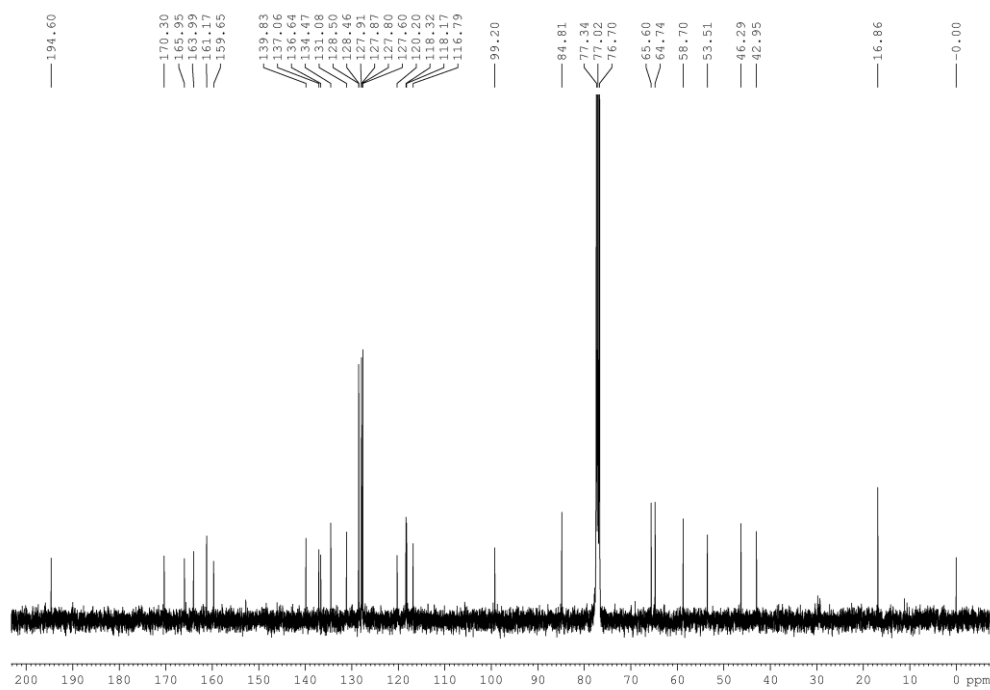SI-Fig. 16. <sup>13</sup>C NMR spectrum of compound **4h**.

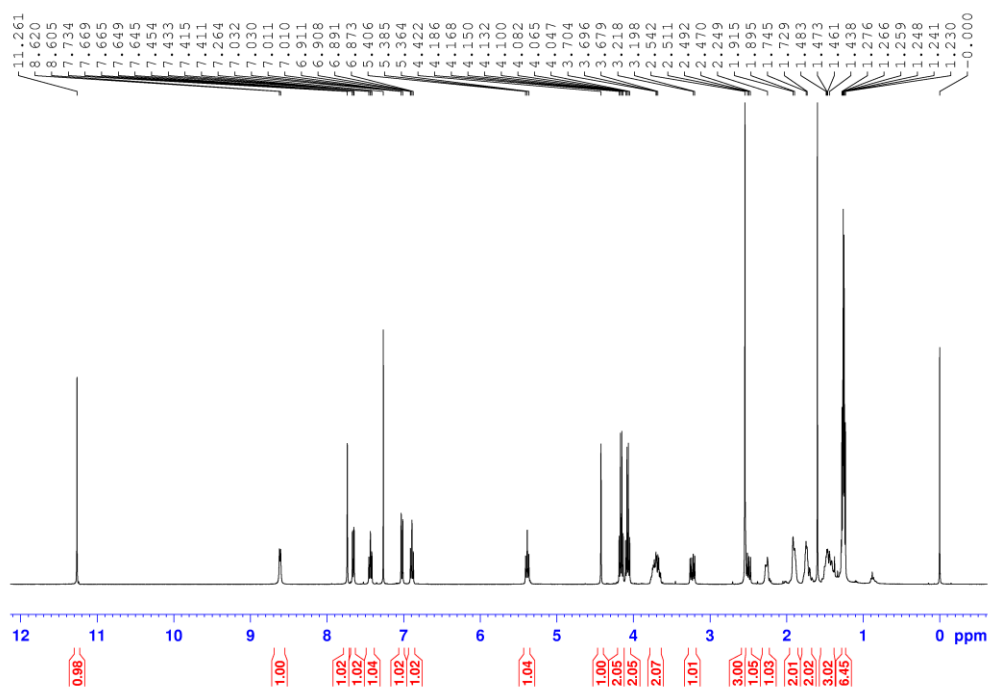SI-Fig. 17.  $^1\text{H}$  NMR spectrum of compound **4i**.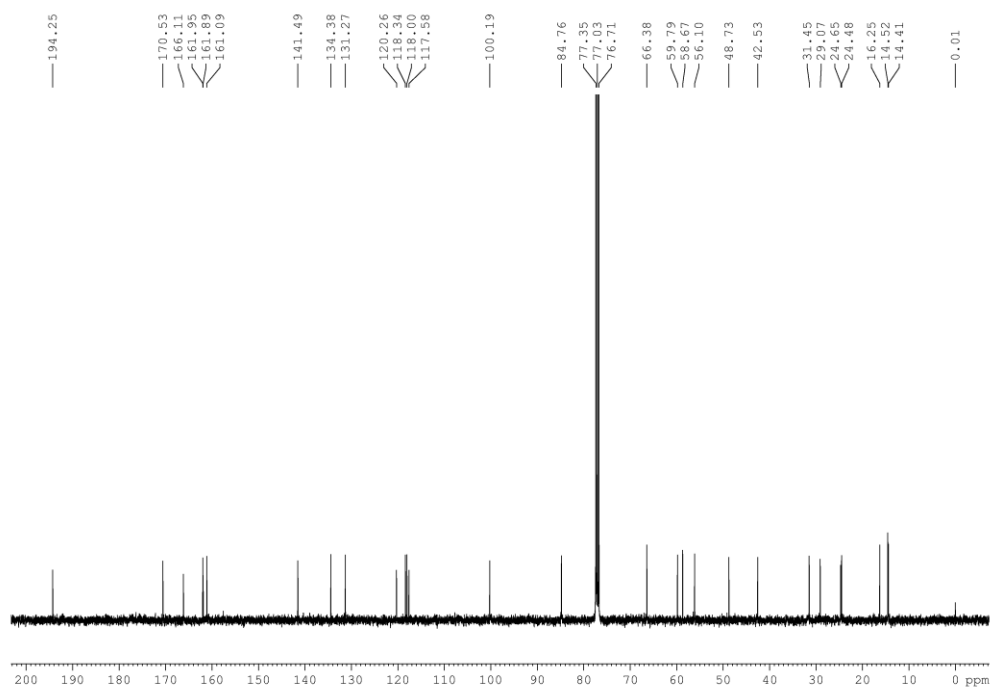SI-Fig. 18.  $^{13}\text{C}$  NMR spectrum of compound **4i**.

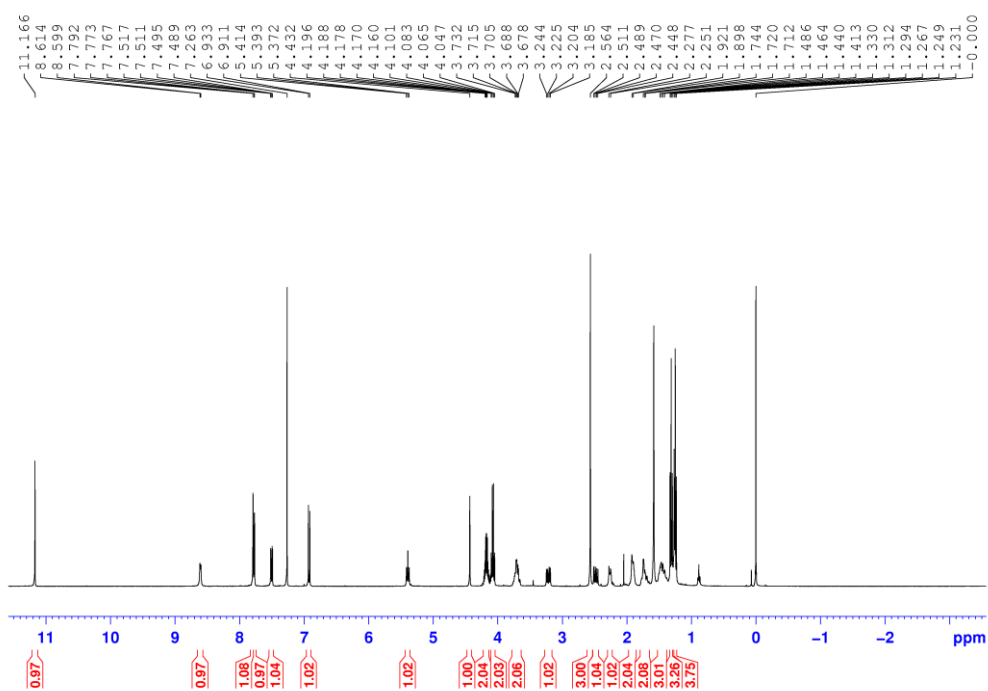SI-Fig. 19. <sup>1</sup>H NMR spectrum of compound 4j.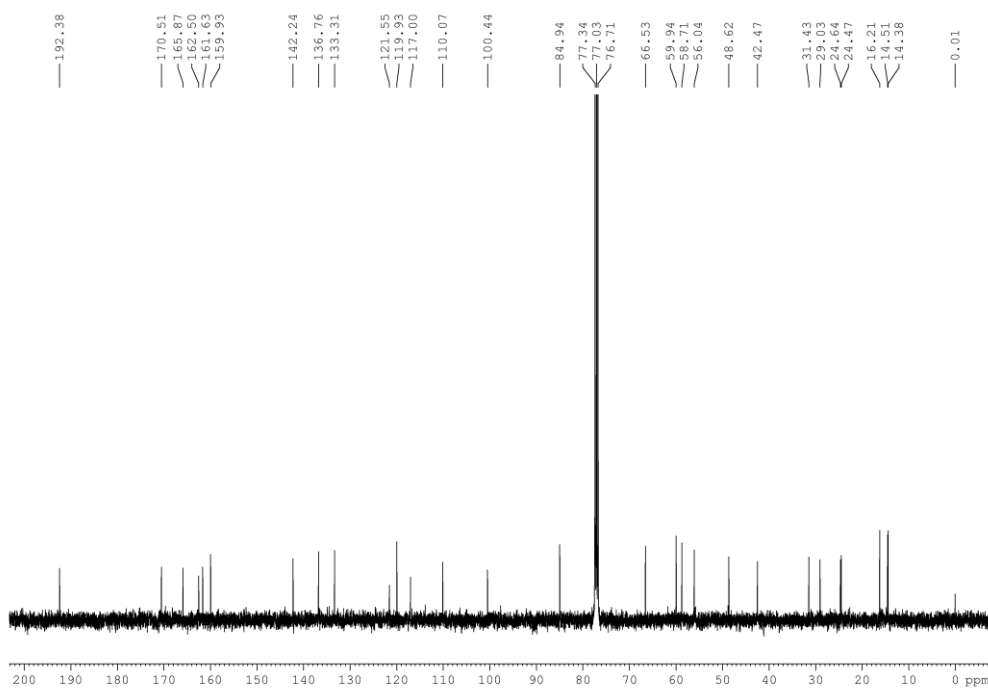SI-Fig. 20. <sup>13</sup>C NMR spectrum of compound 4j.

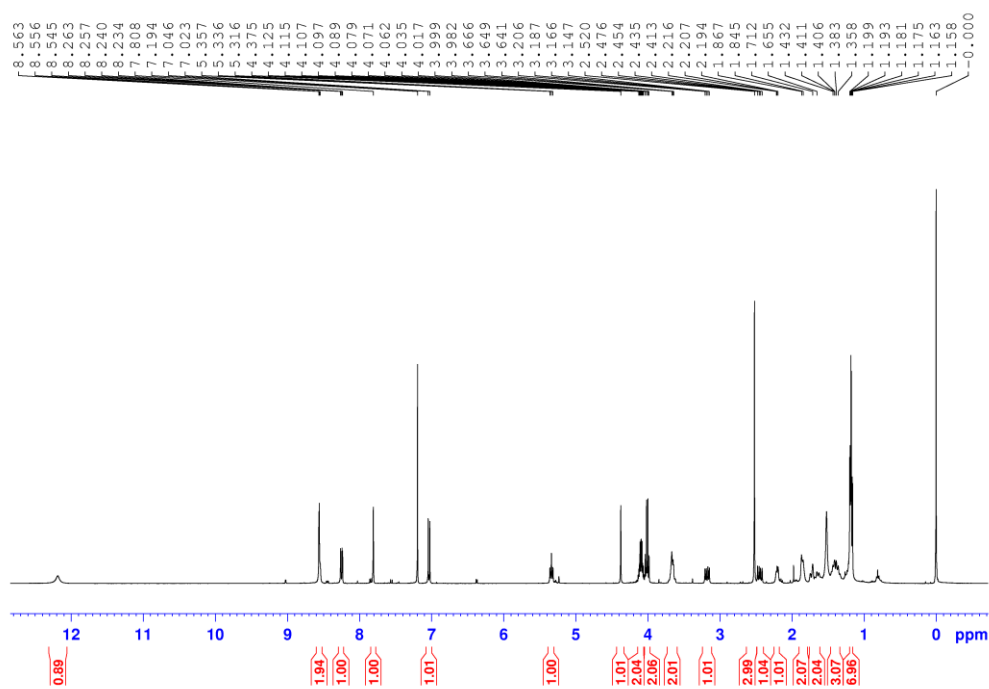SI-Fig. 21. <sup>1</sup>H NMR spectrum of compound 4k.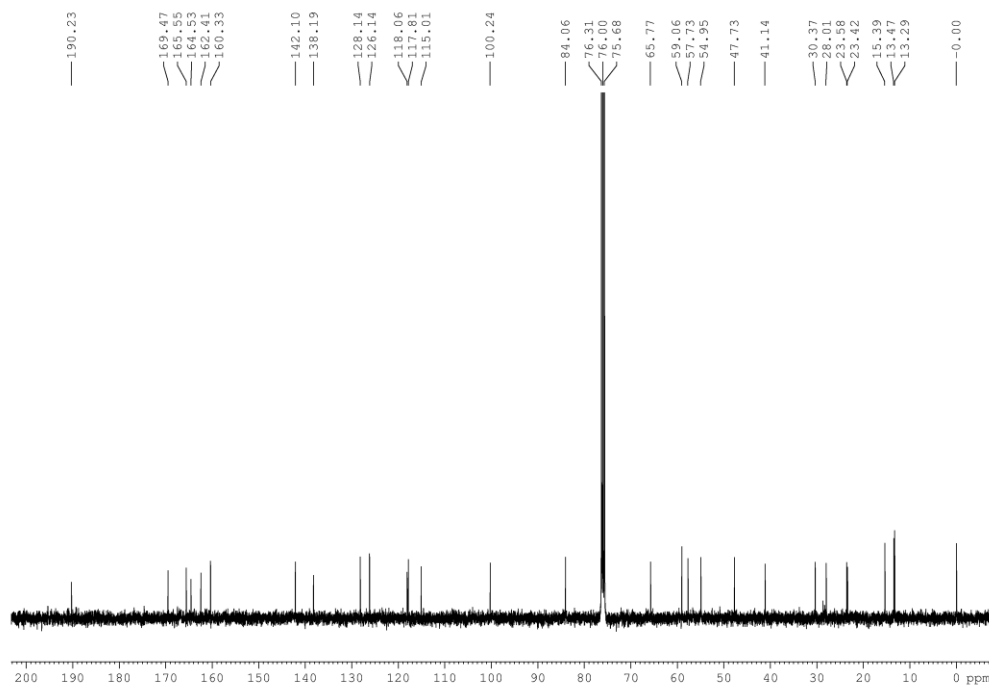SI-Fig. 22. <sup>13</sup>C NMR spectrum of compound 4k.

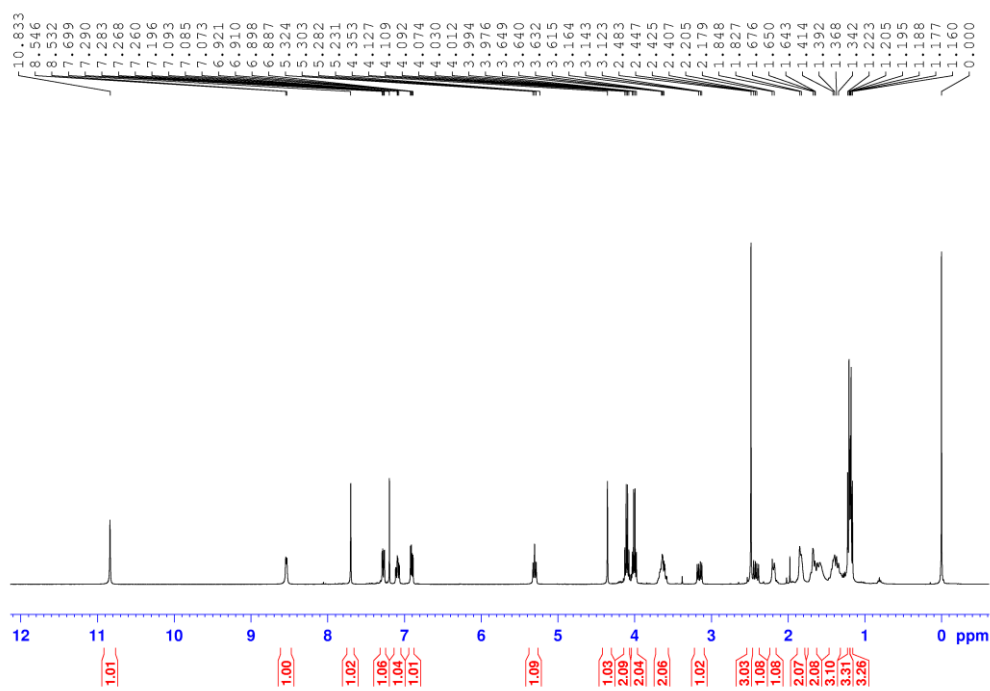SI-Fig. 23.  $^1\text{H}$  NMR spectrum of compound 4l.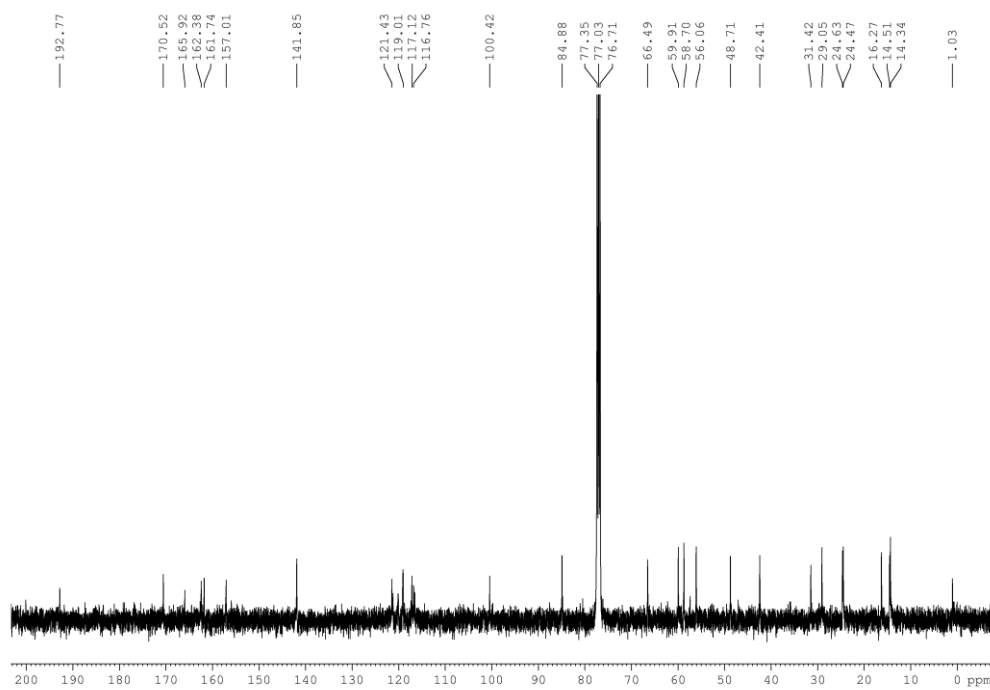SI-Fig. 24.  $^{13}\text{C}$  NMR spectrum of compound 4l.

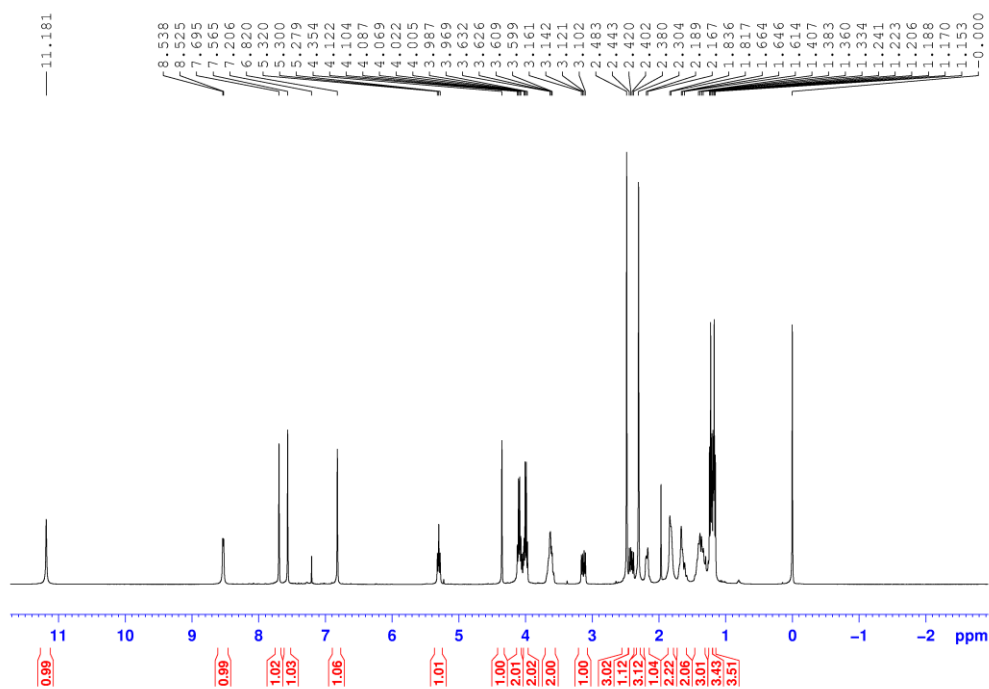SI-Fig. 25.  $^1\text{H}$  NMR spectrum of compound **4m**.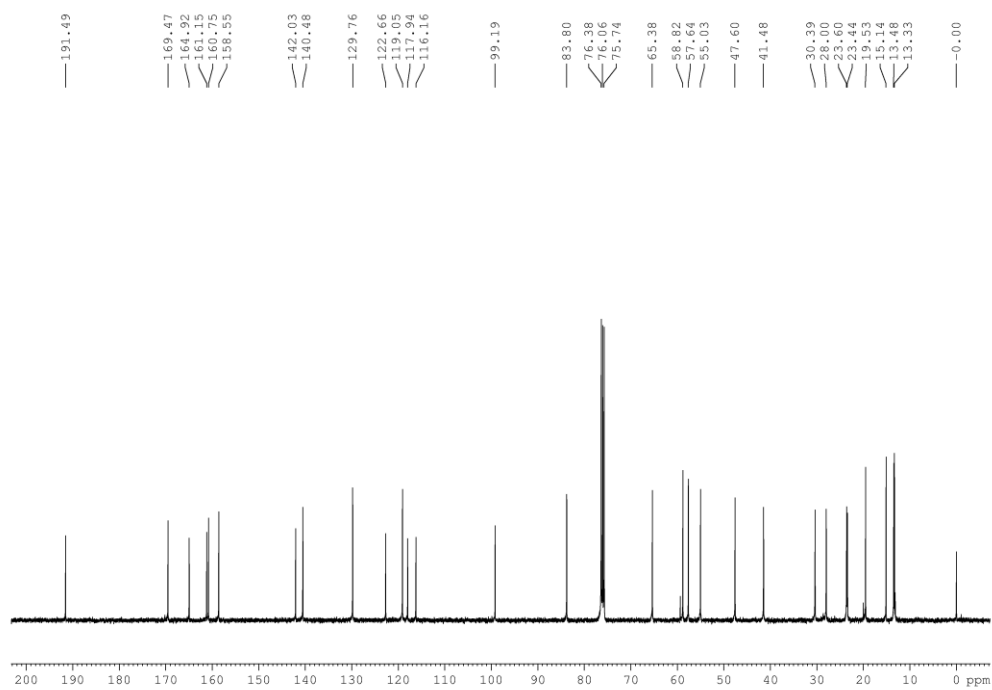SI-Fig. 26.  $^{13}\text{C}$  NMR spectrum of compound **4m**.

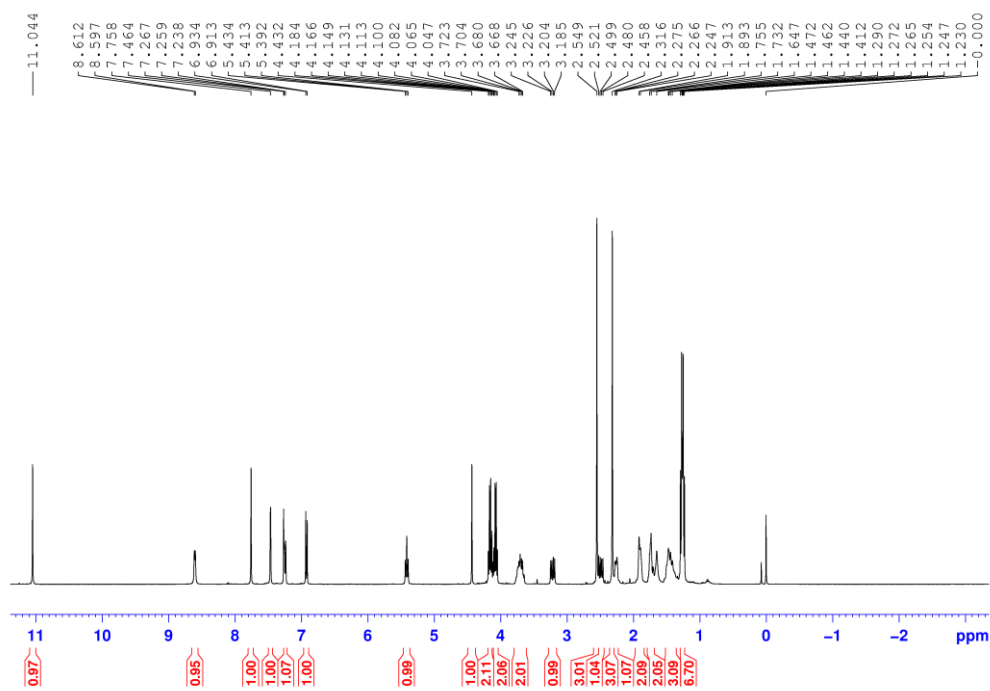SI-Fig. 27.  $^1\text{H}$  NMR spectrum of compound **4n**.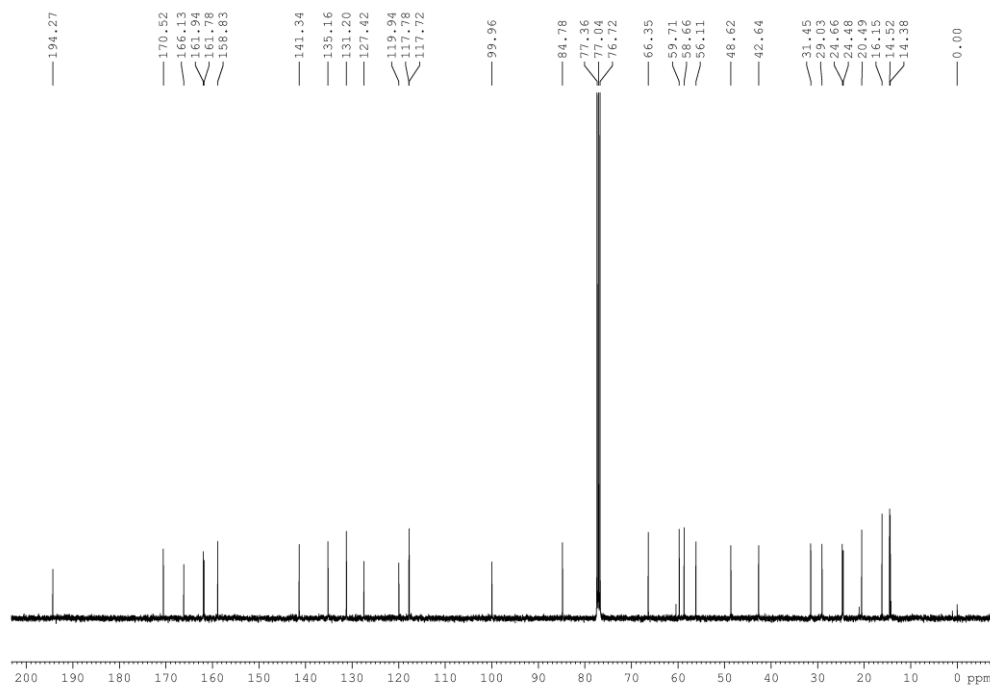SI-Fig. 28.  $^{13}\text{C}$  NMR spectrum of compound **4n**.

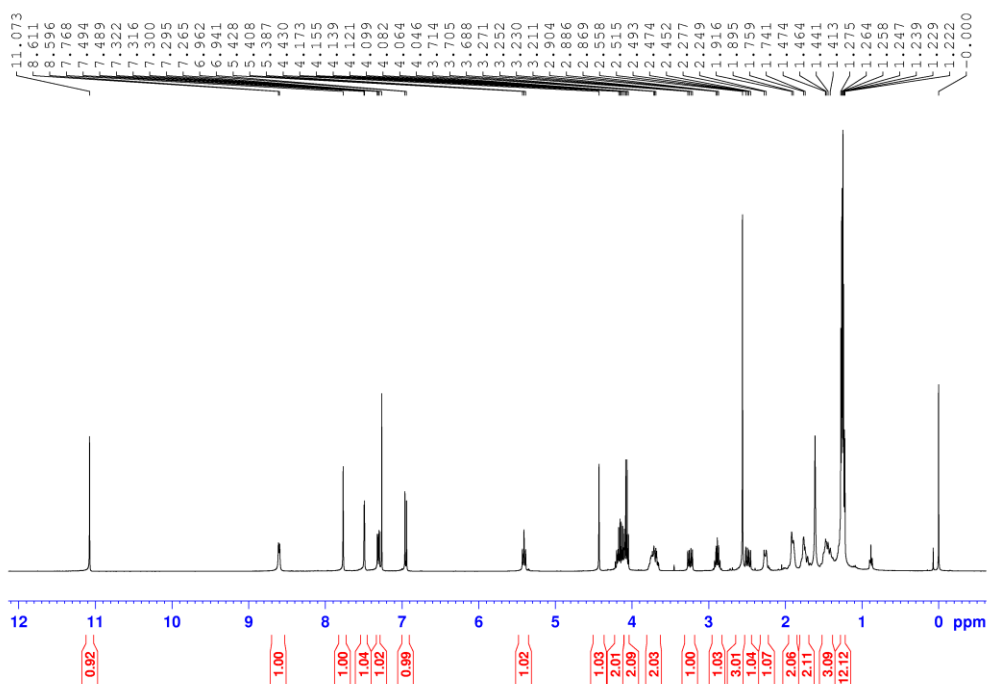SI-Fig. 29. <sup>1</sup>H NMR spectrum of compound 4o.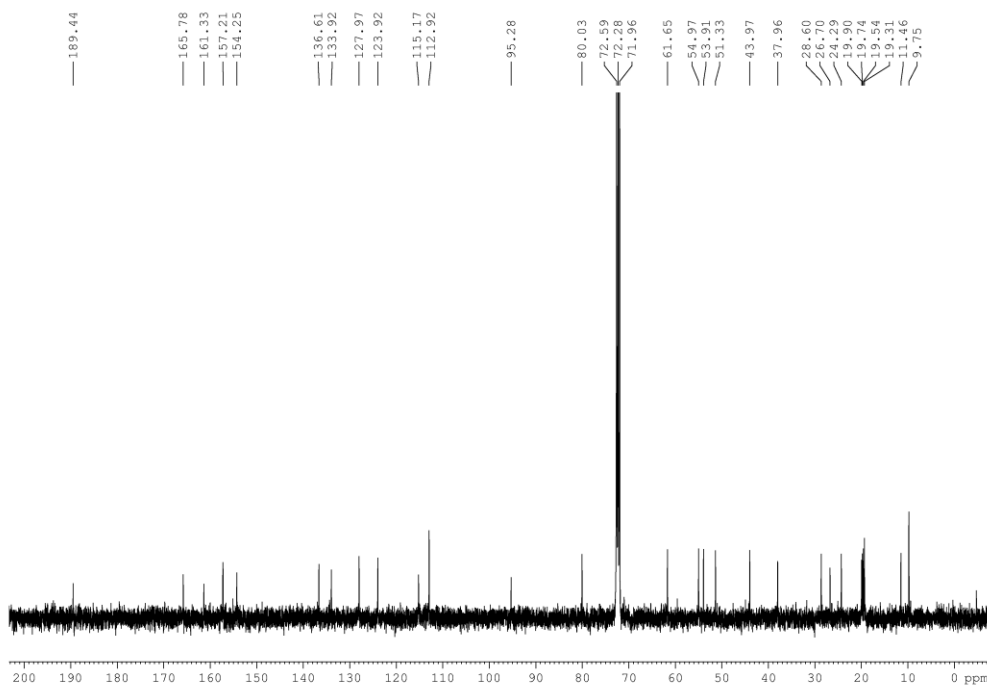SI-Fig. 30. <sup>13</sup>C NMR spectrum of compound 4o.



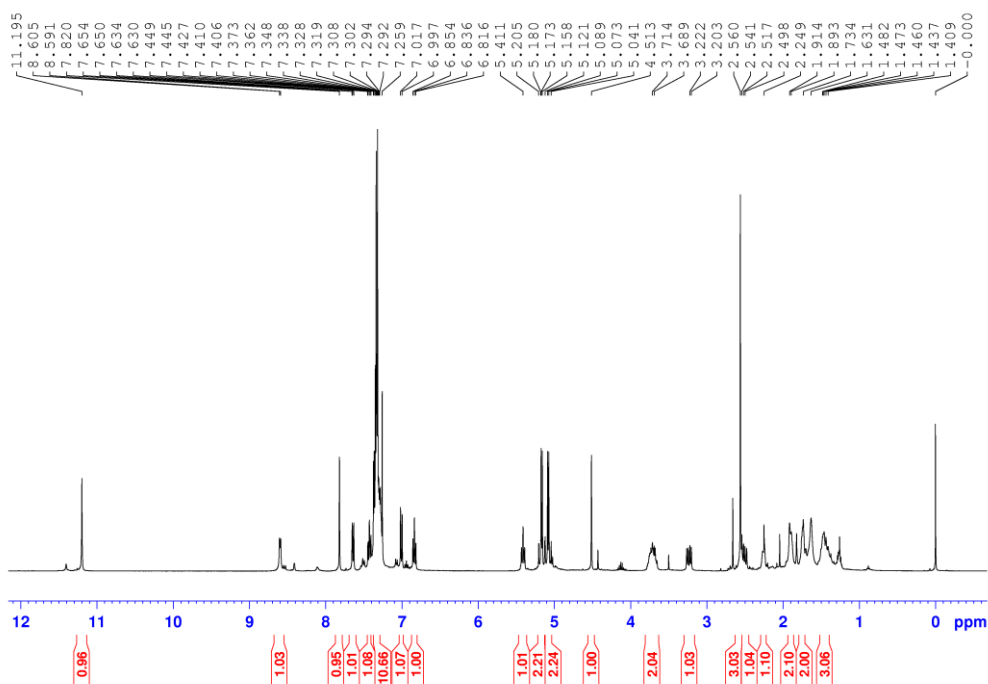SI-Fig. 31. <sup>1</sup>H NMR spectrum of compound 4p.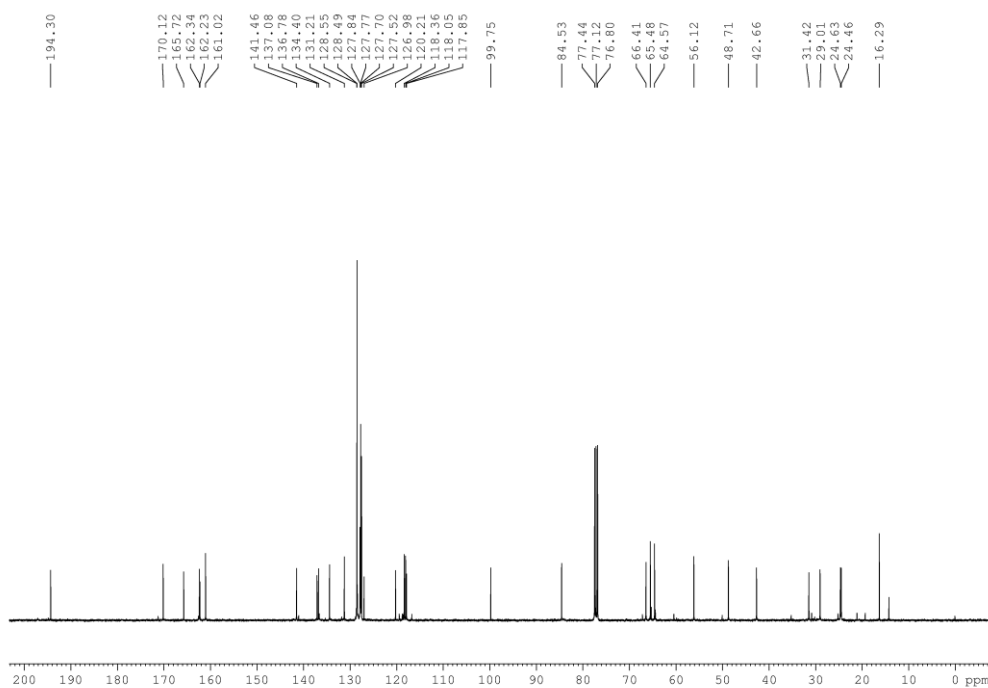SI-Fig. 32. <sup>13</sup>C NMR spectrum of compound 4p.

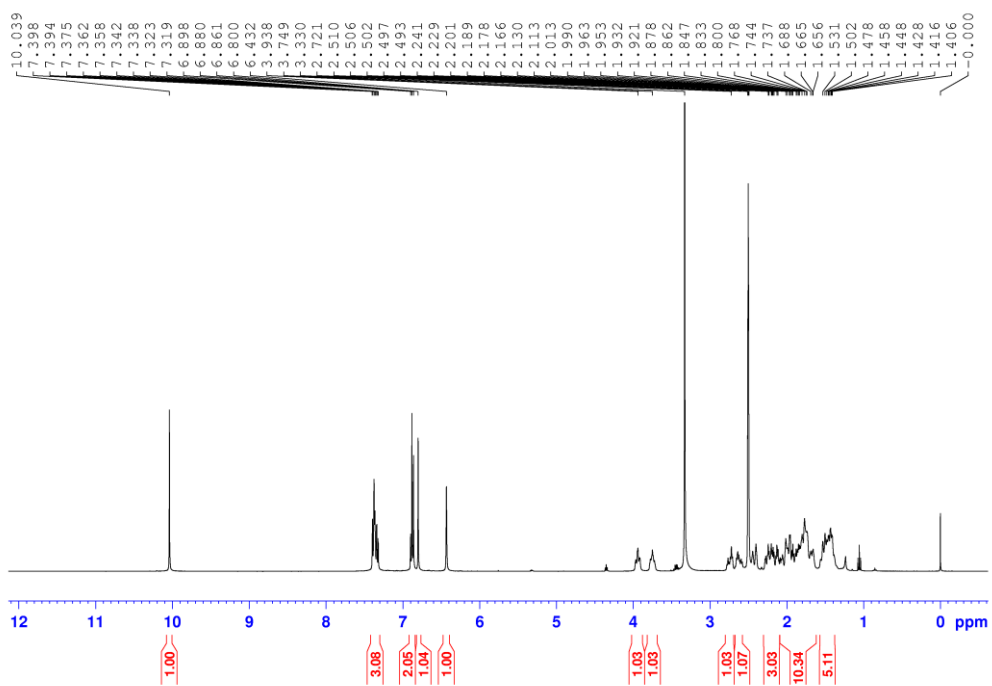SI-Fig. 33. <sup>1</sup>H NMR spectrum of compound **4u**.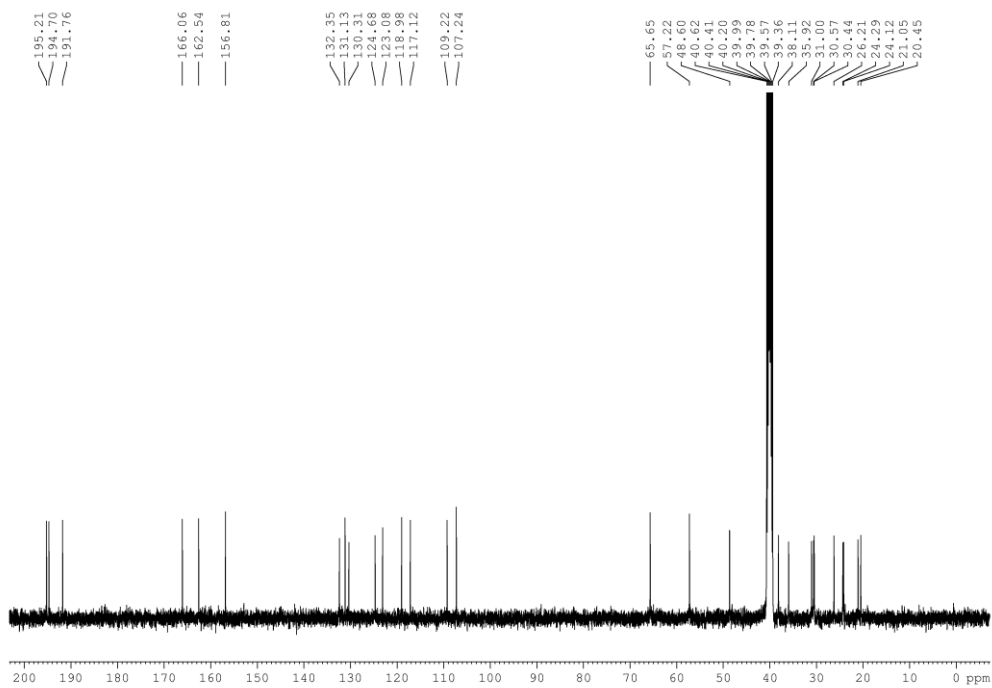SI-Fig. 34. <sup>13</sup>C NMR spectrum of compound **4u**.

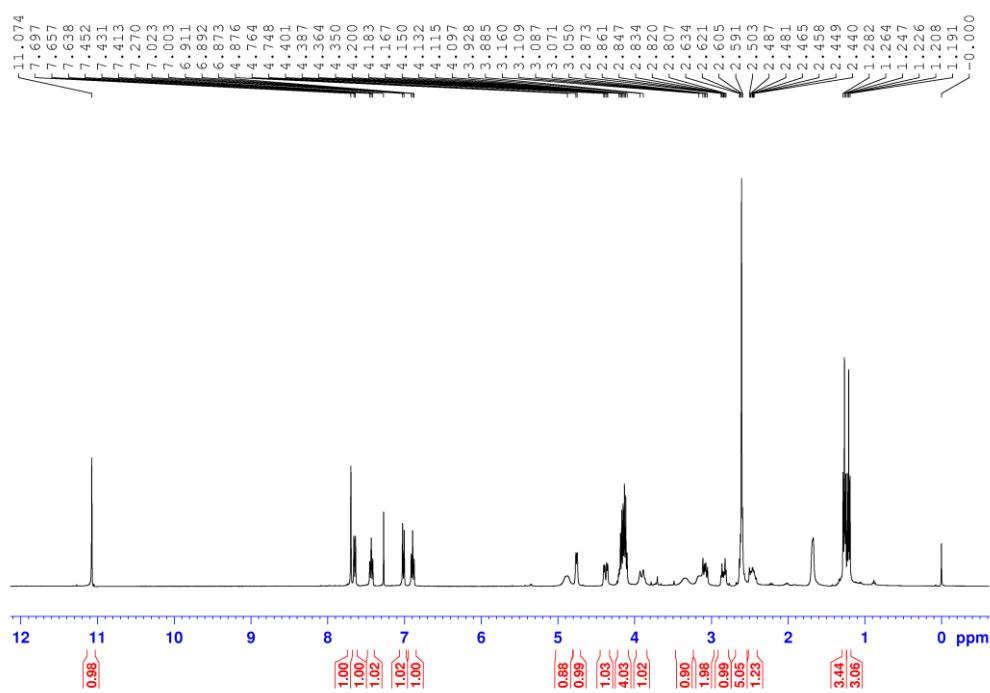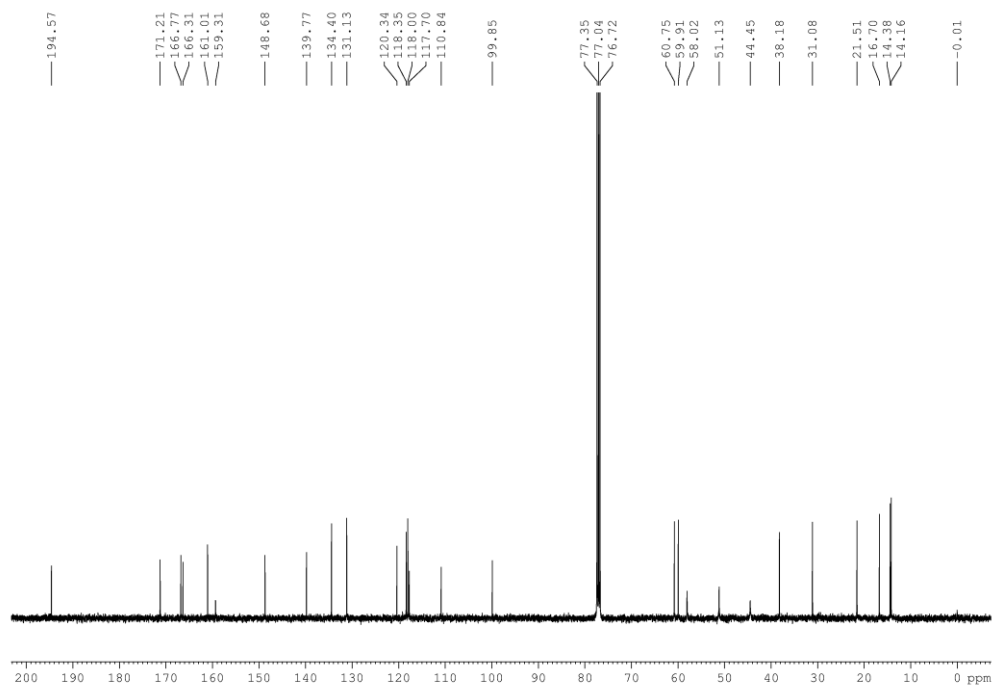

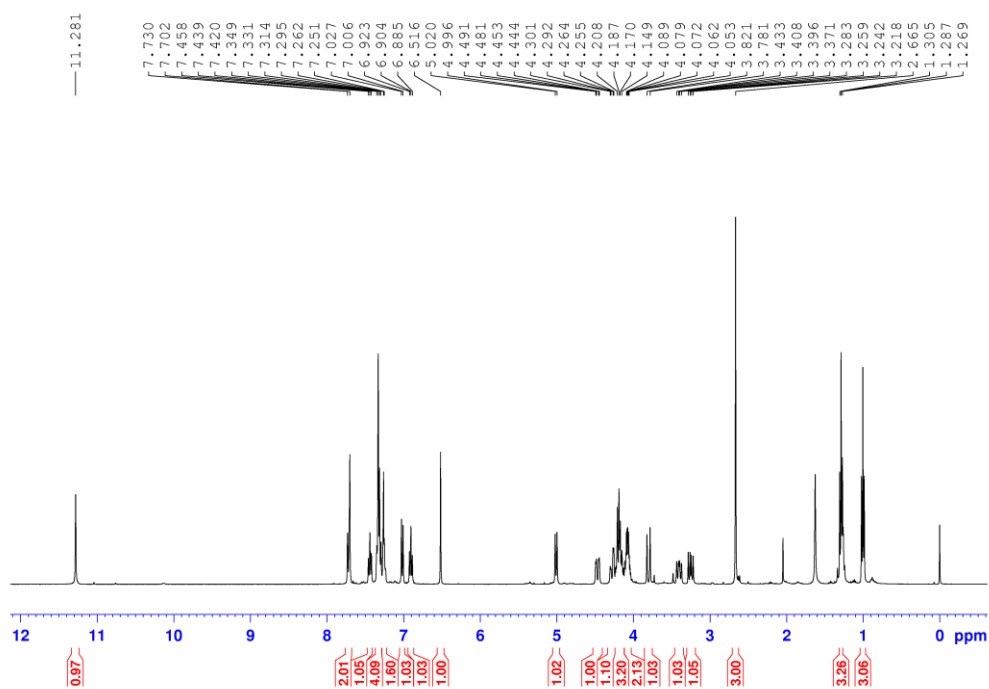SI-Fig. 37. <sup>1</sup>H NMR spectrum of compound **8a**.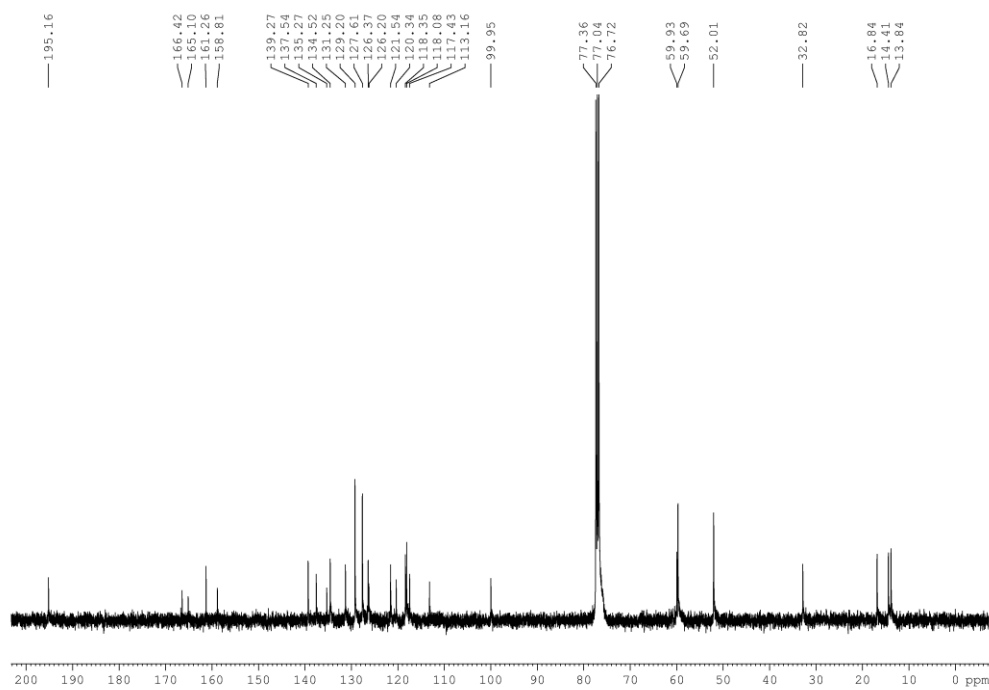SI-Fig. 38. <sup>13</sup>C NMR spectrum of compound **8a**.

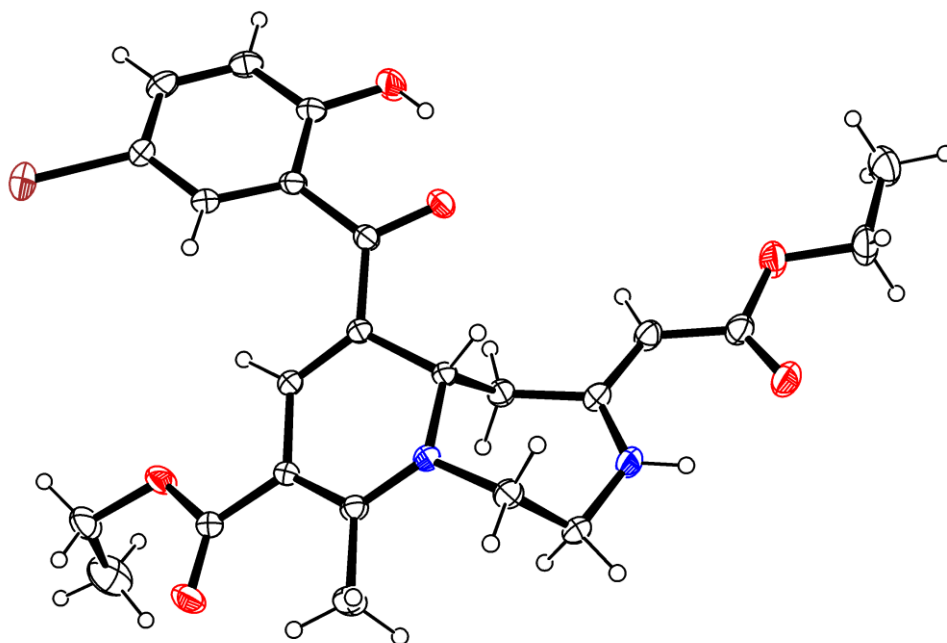

**SI-Fig. 39.** ORTEP diagram of crystal structures of **4b**.

(CCDC-2099263)

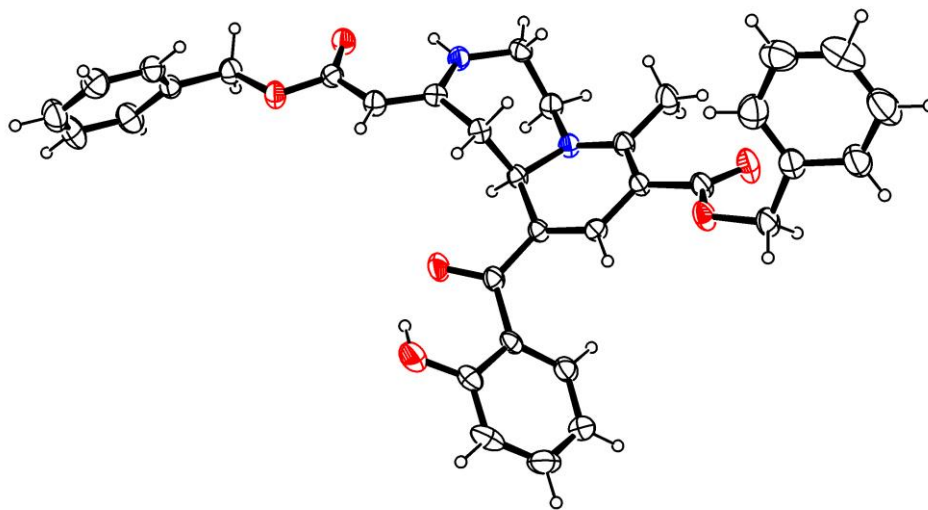

**SI-Fig. 40.** ORTEP diagram of crystal structures of **4h**.

(CCDC-2099269)

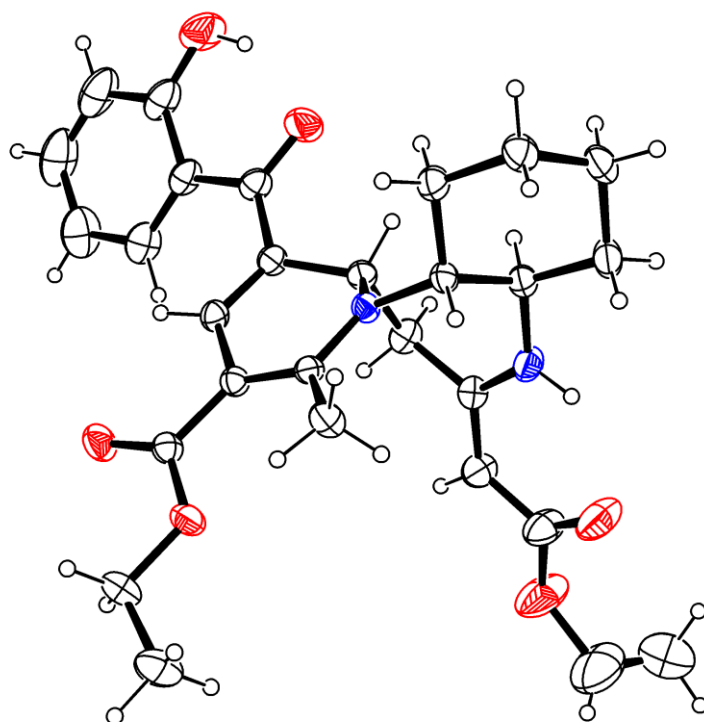

**SI-Fig. 41.** ORTEP diagram of crystal structures of **4i**.

(CCDC-2099272)

SHIMADZU  
LabSolutions 分析报告

## &lt;样品信息&gt;

样品名 : THB-65-se-fan-495-5IPA-30MIN-2  
 样品ID : THB-65-se-fan-495-5IPA-30MIN-2  
 数据文件名 : THB-65-se-fan-495-5IPA-30MIN-2.lcd  
 方法文件名 : Chiral-IPA-95Hex-30min.lcm  
 批处理文件名 : 20201218-FB.lcb  
 样品瓶号 : 1-97  
 进样体积 : 20 uL  
 分析日期 : 2021/11/2 20:14:48  
 处理日期 : 2021/11/2 21:06:52

样品类型 : 未知  
 分析者 : System Administrator  
 处理者 : System Administrator

## &lt;色谱图&gt;

mAU

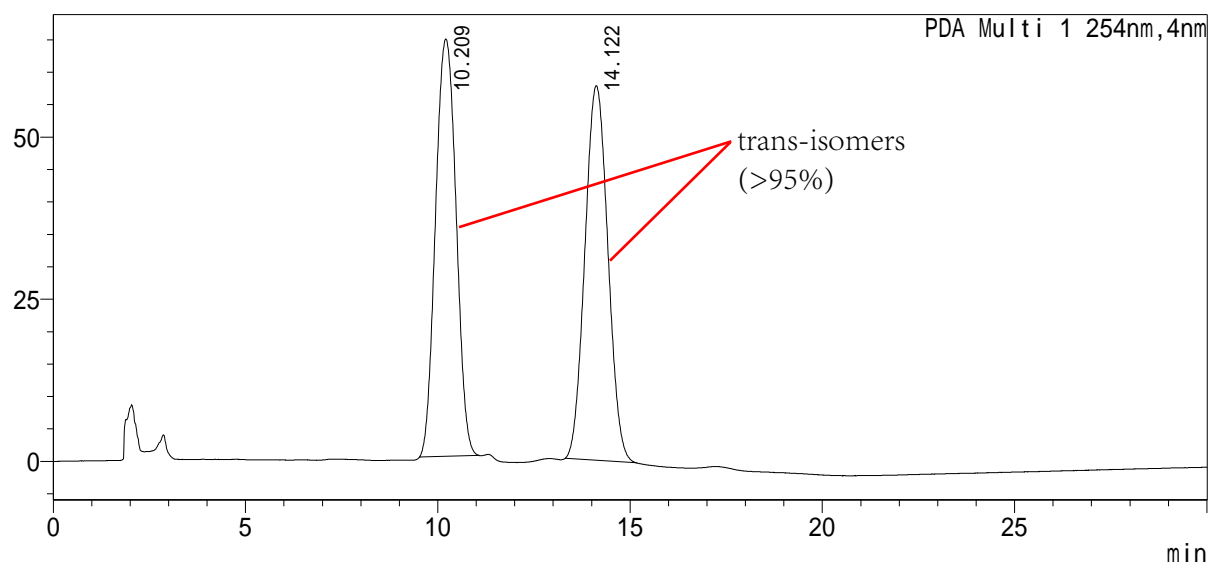

## &lt;峰表&gt;

PDA Ch1 254nm

| 峰号 | 保留时间   | 峰开始    | 峰结束    | 面积      | 面积%     |
|----|--------|--------|--------|---------|---------|
| 1  | 10.209 | 9.525  | 11.061 | 2393724 | 49.924  |
| 2  | 14.122 | 13.312 | 15.157 | 2400989 | 50.076  |
| 总计 |        |        |        | 4794713 | 100.000 |



# SHIMADZU LabSolutions 分析报告

## <样品信息>

样品名 : THB-6Br-5IPA-30MIN-1  
 样品ID : THB-6Br-5IPA-30MIN-1  
 数据文件名 : THB-6Br-5IPA-30MIN-1.lcd  
 方法文件名 : Chiral-IPA-95Hex-30min.lcm  
 批处理文件名 : 20201218-FB.lcb  
 样品瓶号 : 1-82  
 进样体积 : 10  $\mu$ L  
 分析日期 : 2021/11/6 16:53:49  
 处理日期 : 2021/11/11 10:00:52

样品类型 : 未知  
 分析者 : System Administrator  
 处理者 : System Administrator

## <色谱图>

mAU

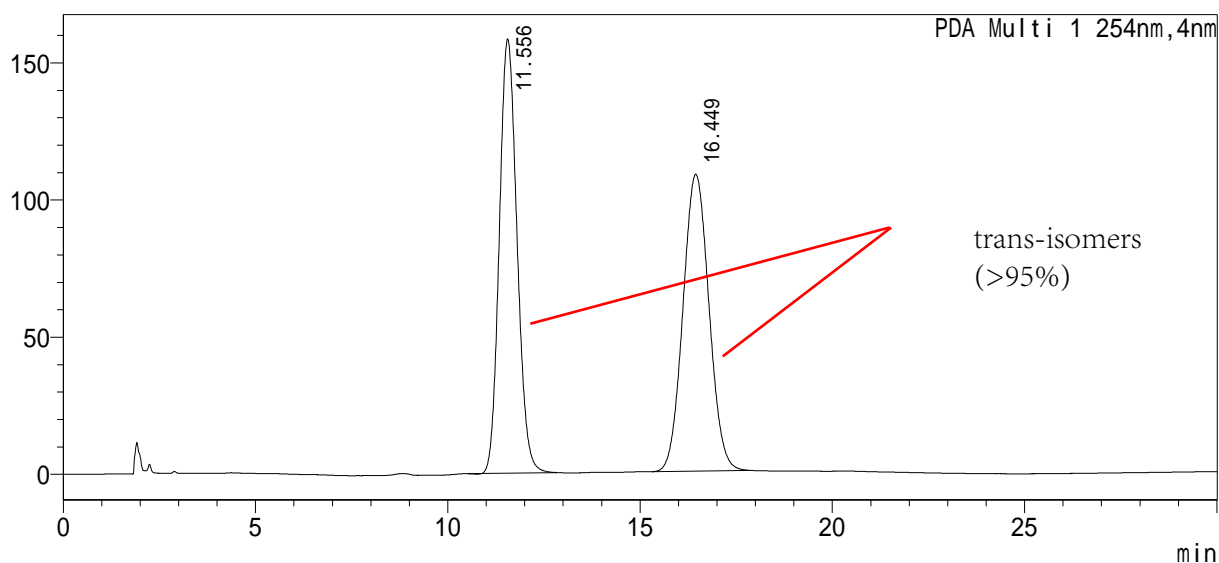

## <峰表>

PDA Ch1 254nm

| 峰号 | 保留时间   | 峰开始    | 峰结束    | 面积       | 面积%     |
|----|--------|--------|--------|----------|---------|
| 1  | 11.556 | 10.517 | 12.811 | 5062489  | 49.877  |
| 2  | 16.449 | 15.307 | 17.845 | 5087466  | 50.123  |
| 总计 |        |        |        | 10149954 | 100.000 |

# SHIMADZU LabSolutions 分析报告

## <样品信息>

样品名 : THB-6NO2-5IPA-30MIN-1  
 样品ID : THB-6NO2-5IPA-30MIN-1  
 数据文件名 : THB-6NO2-5IPA-30MIN-1.lcd  
 方法文件名 : Chiral-IPA-95Hex-30min.lcm  
 批处理文件名 : 20201218-FB.lcb  
 样品瓶号 : 1-85  
 进样体积 : 10 uL  
 分析日期 : 2021/11/6 18:25:26  
 处理日期 : 2021/11/11 10:02:40

样品类型 : 未知  
 分析者 : System Administrator  
 处理者 : System Administrator

## <色谱图>

mAU

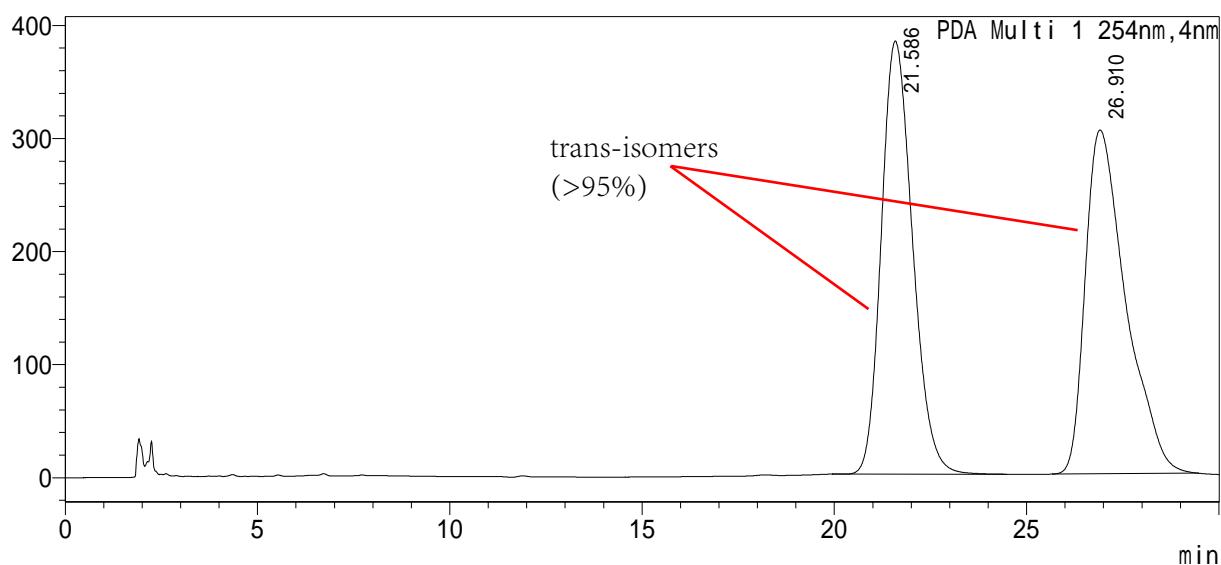

## <峰表>

PDA Ch1 254nm

| 峰号 | 保留时间   | 峰开始    | 峰结束    | 面积       | 面积%     |
|----|--------|--------|--------|----------|---------|
| 1  | 21.586 | 19.936 | 24.469 | 21661633 | 49.298  |
| 2  | 26.910 | 25.664 | 29.461 | 22278536 | 50.702  |
| 总计 |        |        |        | 43940169 | 100.000 |

SHIMADZU  
LabSolutions 分析报告

## &lt;样品信息&gt;

样品名 : THB-6F-5IPA-30MIN-1  
 样品ID : THB-6F-5IPA-30MIN-1  
 数据文件名 : THB-6F-5IPA-30MIN-1.lcd  
 方法文件名 : Chiral-IPA-95Hex-30min.lcm  
 批处理文件名 : 20201218-FB.lcb  
 样品瓶号 : 1-86  
 进样体积 : 20 uL  
 分析日期 : 2021/11/6 18:55:59  
 处理日期 : 2021/11/11 9:35:19

样品类型 : 未知  
 分析者 : System Administrator  
 处理者 : System Administrator

## &lt;色谱图&gt;

mAU

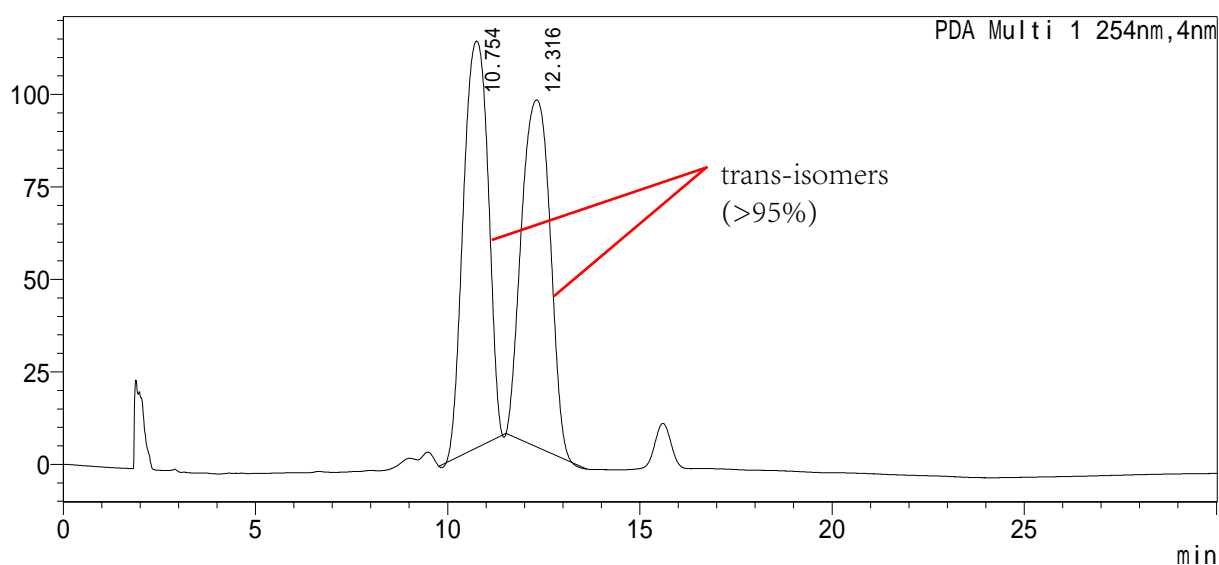

## &lt;峰表&gt;

PDA Ch1 254nm

| 峰号 | 保留时间   | 峰开始    | 峰结束    | 面积      | 面积%     |
|----|--------|--------|--------|---------|---------|
| 1  | 10.754 | 9.771  | 11.520 | 4945289 | 50.334  |
| 2  | 12.316 | 11.520 | 13.611 | 4879653 | 49.666  |
| 总计 |        |        |        | 9824943 | 100.000 |

SHIMADZU  
LabSolutions 分析报告

## &lt;样品信息&gt;

样品名 : THB-6CI-5IPA-30MIN-1  
 样品ID : THB-6CI-5IPA-30MIN-1  
 数据文件名 : THB-6CI-5IPA-30MIN-1.lcd  
 方法文件名 : Chiral-IPA-95Hex-30min.lcm  
 批处理文件名 : 20201218-FB.lcb  
 样品瓶号 : 1-83  
 进样体积 : 10 uL  
 分析日期 : 2021/11/6 17:24:21  
 处理日期 : 2021/11/11 9:36:29

样品类型 : 未知  
 分析者 : System Administrator  
 处理者 : System Administrator

## &lt;色谱图&gt;

mAU

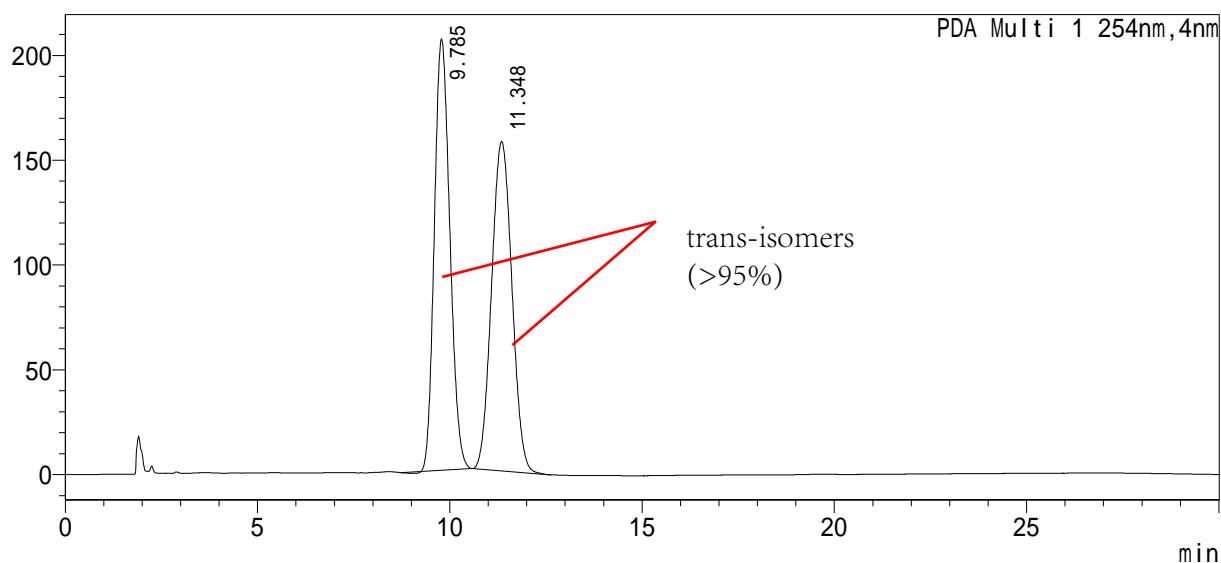

## &lt;峰表&gt;

PDA Ch1 254nm

| 峰号 | 保留时间   | 峰开始    | 峰结束    | 面积       | 面积%     |
|----|--------|--------|--------|----------|---------|
| 1  | 9.785  | 8.725  | 10.571 | 5762056  | 49.924  |
| 2  | 11.348 | 10.571 | 12.608 | 5779698  | 50.076  |
| 总计 |        |        |        | 11541754 | 100.000 |

SHIMADZU  
LabSolutions 分析报告

## &lt;样品信息&gt;

样品名 : THB-6Me-5IPA-30MIN-1  
 样品ID : THB-6Me-5IPA-30MIN-1  
 数据文件名 : THB-6Me-5IPA-30MIN-1.lcd  
 方法文件名 : Chiral-IPA-95Hex-30min.lcm  
 批处理文件名 : 20201218-FB.lcb  
 样品瓶号 : 1-84  
 进样体积 : 10 uL  
 分析日期 : 2021/11/6 17:54:54  
 处理日期 : 2021/11/11 9:26:29

样品类型 : 未知  
 分析者 : System Administrator  
 处理者 : System Administrator

## &lt;色谱图&gt;

mAU

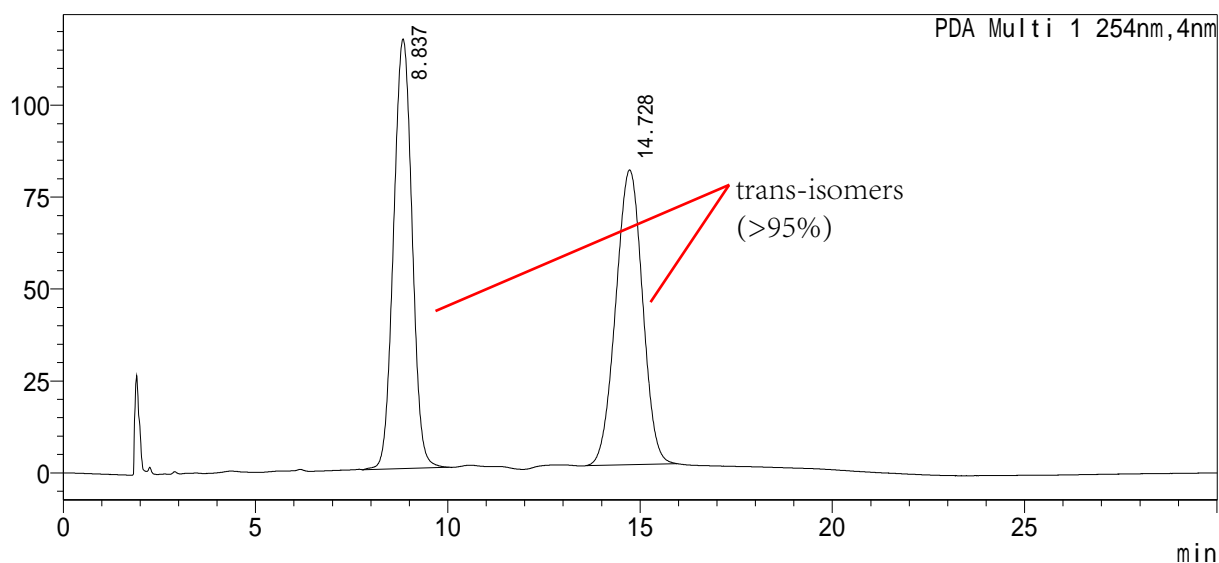

## &lt;峰表&gt;

PDA Ch1 254nm

| 峰号 | 保留时间   | 峰开始    | 峰结束    | 面积      | 面积%     |
|----|--------|--------|--------|---------|---------|
| 1  | 8.837  | 7.776  | 10.016 | 3911467 | 50.251  |
| 2  | 14.728 | 13.611 | 15.947 | 3872371 | 49.749  |
| 总计 |        |        |        | 7783837 | 100.000 |

SHIMADZU  
LabSolutions 分析报告

## &lt;样品信息&gt;

样品名 : THB-6iPr-5IPA-30MIN-1  
 样品ID : THB-6iPr-5IPA-30MIN-1  
 数据文件名 : THB-6iPr-5IPA-30MIN-1.lcd  
 方法文件名 : Chiral-IPA-95Hex-30min.lcm  
 批处理文件名 : 20201218-FB.lcb  
 样品瓶号 : 1-81  
 进样体积 : 10 uL  
 分析日期 : 2021/11/6 16:23:17  
 处理日期 : 2021/11/11 9:37:24

样品类型 : 未知  
 分析者 : System Administrator  
 处理者 : System Administrator

## &lt;色谱图&gt;

mAU

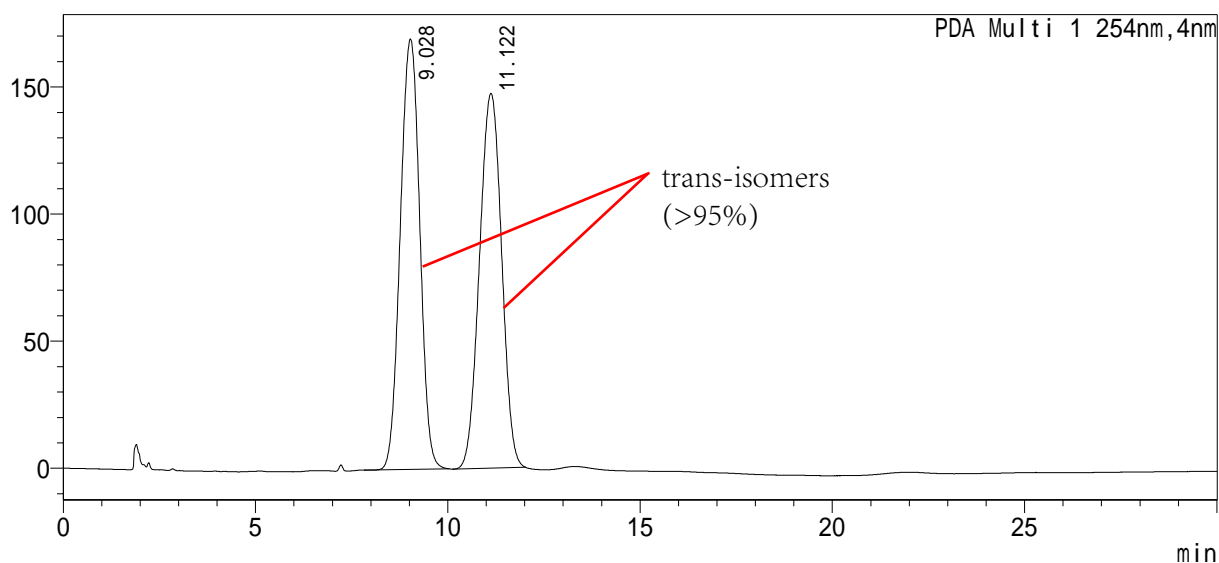

## &lt;峰表&gt;

PDA Ch1 254nm

| 峰号 | 保留时间   | 峰开始    | 峰结束    | 面积       | 面积%     |
|----|--------|--------|--------|----------|---------|
| 1  | 9.028  | 7.829  | 10.016 | 5950867  | 50.268  |
| 2  | 11.122 | 10.123 | 12.011 | 5887392  | 49.732  |
| 总计 |        |        |        | 11838258 | 100.000 |

SHIMADZU  
LabSolutions 分析报告

## &lt;样品信息&gt;

样品名 : THB-OBn-5IPA-30MIN-17  
 样品ID : THB-OBn-5IPA-30MIN-17  
 数据文件名 : THB-OBn-5IPA-30MIN-17.lcd  
 方法文件名 : Chiral-IPA-99Hex-30min.lcm  
 批处理文件名 : 20201218-FB.lcb  
 样品瓶号 : 1-88  
 进样体积 : 20 uL  
 分析日期 : 2021/11/23 11:13:34  
 处理日期 : 2021/11/23 12:35:57

样品类型 : 未知  
 分析者 : System Administrator  
 处理者 : System Administrator

## &lt;色谱图&gt;

mAU

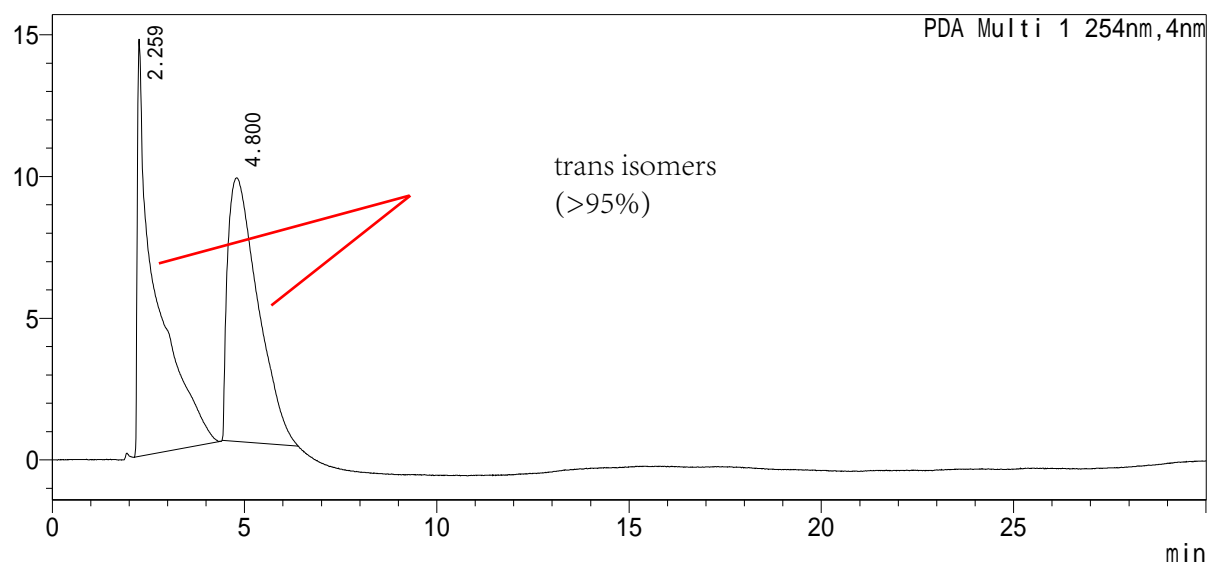

## &lt;峰表&gt;

PDA Ch1 254nm

| 峰号 | 保留时间  | 峰开始   | 峰结束   | 面积     | 面积%     |
|----|-------|-------|-------|--------|---------|
| 1  | 2.259 | 2.123 | 4.384 | 488038 | 49.007  |
| 2  | 4.800 | 4.416 | 6.389 | 507817 | 50.993  |
| 总计 |       |       |       | 995855 | 100.000 |

SHIMADZU  
LabSolutions 分析报告

## &lt;样品信息&gt;

样品名 : THB-13-fan-solid-5IPA-30MIN-4  
 样品ID : THB-13-fan-solid-5IPA-30MIN-4  
 数据文件名 : THB-13-fan-solid-5IPA-30MIN-4.lcd  
 方法文件名 : Chiral-IPA-95Hex-30min.lcm  
 批处理文件名 : 20201218-FB.lcb  
 样品瓶号 : 1-98  
 进样体积 : 20 uL  
 分析日期 : 2021/11/6 15:52:46  
 处理日期 : 2021/11/22 20:29:53

样品类型 : 未知  
 分析者 : System Administrator  
 处理者 : System Administrator

## &lt;色谱图&gt;

mAU

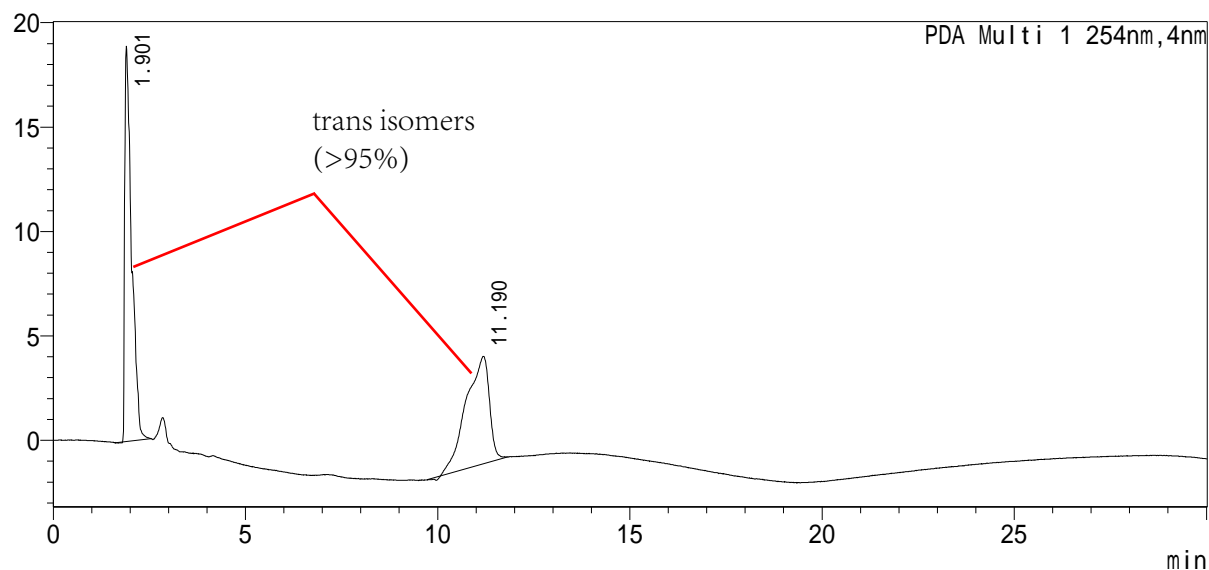

## &lt;峰表&gt;

PDA Ch1 254nm

| 峰号 | 保留时间   | 峰开始   | 峰结束    | 面积     | 面积%     |
|----|--------|-------|--------|--------|---------|
| 1  | 1.901  | 1.600 | 2.539  | 235152 | 51.855  |
| 2  | 11.190 | 9.728 | 11.819 | 218330 | 48.145  |
| 总计 |        |       |        | 453482 | 100.000 |
